# Supplementary material for: A numerical study of the influence of terrain on wakes, blockage, wind farm efficiency, and turbine efficiency
Source: Copernicus journal article supplement (doi:10.5194/wes-2025-291), 2026-01-21
Supplement: Supplementary file [file wes-2025-291-AC1-supplement.pdf]

**This document contains the responses to both reviewers. Significant additions were made to the manuscript to address their feedback. This has increased its length by ten pages – though seven of those pages are in the Appendix. All changes in the revised manuscript are redlined relative to the original with the exception of changes to Table 1 and instances where text has been moved around a figure (e.g. from just before a figure to just after). The revised and redlined manuscript is appended to the end of this document.**

## **Reviewer 1**

### **Review of ‘A numerical study of the influence of terrain on wakes, blockage, wind farm efficiency, and turbine efficiency’**

The article investigates the effect of an idealized terrain on the wake, blockage, and efficiency of wind farms. As articulated by the author, the study aims to extend the existing knowledge on terrain effects on individual wind turbine wakes and efficiency to a wind farm scale. This is a very interesting and important step forward in understanding the effect of terrain-induced pressure gradient on the wind farm performance and flow. Overall, the article is well written and easy to follow. I will recommend publication of the article, given the following questions/comments are adequately addressed:

**Thank you for this review. It has led to improvements to the paper. I respond point-by-point below.**

1. Terrain affects the flow in two ways: by imposing pressure gradients (which then lead to flow acceleration/deceleration) and by changing vertical flow shear – which alters turbulence production in the flow. The first of these effects is thoroughly discussed in the article; however, the second one appears to be completely ignored. It is suggested to at least discuss why terrain-induced turbulence can be ignored/does not play a significant role in this study. In addition, the effect of terrain-induced turbulence is also missing from the discussions/limitations section. I think this effect is worth discussing as well.

**I have made some substantial changes to address this omission from the original manuscript. These changes include the following:**

- **The Introduction now acknowledges the impact of terrain on turbulence and how this can affect wake recovery. Supporting references are included.**
- **Section 3.1, which discusses the two-row wind farm simulations, now addresses the influence of turbulence on the wake recovery between the first row and the second row. More specifically, we compare terrain-induced turbulence and terrain-induced pressure with respect to their impact on case-to-case wake recovery trends. The discussion in this section is based**

on the results of control volume analyses of the RANS solutions used in Section 3.1. The control volume analyses are described in detail in the Appendix.

- Section 3.2, which focuses on blockage-related loss in single-row wind farms, now includes a sentence reporting the correlation between wind farm efficiency and freestream turbulence intensity, which is affected by terrain. The correlation is weaker than the correlation with pressure coefficient and Froude number.
- In part due to the feedback related to turbulence from the reviewers, there was a major change to the end of Section 3.1 where the paper evaluates a hybrid approach to calculating turbine interaction loss (i.e. combine results from freestream simulation of terrain with wind farm simulation without terrain). The evaluation reflects the fact that in practice a hybrid approach may account for terrain-induced turbulence. This is now acknowledged in the revised manuscript. The revision also now includes results from testing a second hybrid approach. The errors from the second hybrid approach are notably smaller on average than the errors from the first. Based on the above, I decided to shorten the write-up on the evaluation of the hybrid approaches and soften the related conclusions.
- There are other smaller additions, including a few related to the ability of engineering models to account for terrain-induced turbulence in Section 3.1 (twice) and Section 4.1. The revised manuscript also acknowledges the impact of the much higher background turbulence on wakes in the main valley case (Case J).

**These additions materially increased the length of an already long paper, but I believe they are needed to sufficiently address the reviewers' reasonable concerns regarding this point. Much of the additional content is in the Appendix.**

2. The simulations use a spanwise inter-turbine spacing of  $2D$ , which sounds very small. It is recommended to add an explanation or justification for choosing such a small spacing. On a similar note, the streamwise spacing in two row wind farm is chosen to be  $15D$ . A possible explanation behind this choice will be beneficial.

**I added text to the first paragraph in section 2.3 to address this:**

The inter- and intra-row spacing is intended to be representative of wind farms in places with one dominant wind direction sector or two opposing dominant sectors. At these wind farms, the spacing between turbines in a row is typically  $1.5 D$  to  $3.0 D$ ; the distance between rows is typically  $10 D$  to  $20 D$ . Such wind farms are common in Brazil, Chile, the U.S. Southern Plains, the western U.S., and the Taiwan Strait. Tight spacing between turbines is also common when a wind farm is located along a ridgeline.

3. Given the large number of simulations, I would suggest adding a table summarizing the distinguishing features of different simulations. I see that some selected simulations are summarized in a table in section 3.2. Perhaps a complete description earlier in the study could be added.

**I have expanded the table to include all 28 single-row cases. I have also added columns to the table based on feedback from both reviewers. The table is not redlined even though about 75% of it is new.**

**The new, more complete table revealed an error I made in the description of Case A\*\*, which was supposed to be Case A with the buoyancy term in the vertical momentum equation zeroed out. What I had done instead was zero out the buoyancy *and* change the geostrophic wind speed in order to achieve freestream wind speeds at the turbine locations that are similar to those in Case A (the turbines are at the crest of the hill). Rather than change the text, I reran Case A\*\* to be consistent with how it is described in the paper (same as Case A but with buoyancy off). The change made very little difference in the results. The turbine interaction loss went from 1.36% to 1.29%.  $C_p$  went from 0.445 to 0.443. Figure 16 and Figure 18 were updated accordingly. The change did not materially affect the correlation coefficients derived from these figures. I did have to update the reported difference in  $\eta$  between Case A\*\* and Case D\*\* (line 674). The change is larger than the change in  $\eta$  for Case A\*\*. It appears I made a mistake when determining (or simply typing) the originally reported value, which should have been 1.72%, not 1.92%.**

4. A brief description/quantification of the free-stream flow in terms of speed-up and turbulence levels will benefit the reader in understanding the flow conditions wind farm/turbines are exposed to.

**The freestream turbulence intensity at the turbine locations is now reported in the table. The table also includes the hub-height wind speed at the inflow boundary. Comparing this value with the freestream wind speed at the wind farm, which is already in the table, provides an indication of the speedup between the inflow boundary and the turbine locations.**

5. In figure 7, it will be interesting to point the position of turbine rows to give the reader an idea of the pressure gradient experienced by the turbines in different rows.

**Good suggestion. This has been done.**

6. The discussion in lines 289-294 on the effect of wake trajectory is very qualitative. Perhaps a more quantitative approach could be used to support the argument that the trajectory effect is negligible in the current study.

**I have gone ahead and added some analysis and text to substantiate the assertion that the turbine interaction loss trends are more the result of differences in the wake deficits than to differences in the vertical positions of the wakes. Along with the new text, a white line has been added to each of the three plots in Figure 5 to indicate the height of the maximum wind speed deficit as it varies laterally for each of the three cases. The added text in Section 3.1 is as follows:**

The average deficit along the maximum-deficit white lines in Figure 5 is 12% for the *flat* case, 9.6% for the *hill windward* case, and 19.5% for the *hill leeward* case. When these deficits are run through the turbine power curve, they translate to power loss factors of 0.68, 0.74, and 0.52, respectively. These trends strongly resemble the case-to-case variation in the turbine interaction loss factor for the second row seen in Figure 6a (0.74, 0.81, and 0.57, respectively), suggesting that despite some differences in the vertical positions of the wakes between the cases, differences in the magnitudes of the wake deficits still appear to be the main driver behind the power loss trends across these simulations.

7. A lot of the contours are shown at the ‘hub height’. How is the hub height defined? Is it a local one, meaning at each  $x$ , whatever the hub height would be, thereby a terrain-following hub height? Also, as mentioned by the author, and seen in previous studies, the wake trajectory may not fully follow the hub height trajectory. How would that influence the interpretation of some of the results?

**The other reviewer asked a similar question about the “hub height” plots. To clarify the situation, text has been added to Section 3.1 that reads as follows:**

This section also includes many references to *height*, which here means the vertical distance above the local ground level. For example, a hub-height surface is one where all points on the surface are 115 m directly above the local terrain.

**I also added a couple mentions of hub-height surfaces later in the section to clarify what is meant by plotting the horizontal variation of a quantity “at hub height”.**

**In the second part of comment, the reviewer points out that wakes may not (and in fact don’t) fully follow the terrain and asks then how this might affect the interpretation of the hub-height contour plots. It’s a good and fair question. The hub-height contour plots do not provide a complete view of the wakes and how they vary from case-to-case. The top-view hub-height plots in Figure 4 are supplemented with contour plots on vertical constant- $x$  planes in Figure 5, which offer a more complete, though not fully complete, view of the wake differences between the three two-row cases in Section 3.1. The top-view hub-height contour plots of the single-row results in Section 3.2, however, do not in the original manuscript include additional contour plots on vertical constant- $x$  planes. The main point of these top-view plots is to give the reader a qualitative sense for how**

**much terrain can affect wakes and blockage at hub height, along with an idea of the direction of the trends. Since terrain can materially affect the trajectory of a turbine wake, it is reasonable to wonder whether these top-view hub-height plots are sufficient to draw qualitative conclusions about the case-to-case trends in wake deficits at other heights. I have tried to address this with an additional figure now included at the end of the Appendix along with text in the Section 3.2 (lines 471-477):**

The hub-height plots in Fig. 8 are intended to show the effect of terrain on blockage and wakes. In this section, there are eleven of these top-view hub-height plots, corresponding to first eleven cases in Table 1. To supplement these plots, and in consideration of the expected effect of terrain on wake trajectory, Fig. A-3 at the end of the Appendix shows the wake deficits on constant-x vertical planes 8 D downstream of the turbine row for each of the eleven cases. These plots confirm that terrain affects the vertical trajectory of the turbine wakes, but they also indicate that the hub-height plots in this section provide a reasonable representation of how the wake deficits vary from case to case through the rotor layer, at least close to the wind farm.

8. More details on the assessment for the real wind farm are needed. Specifically, the discussion in lines 620-630 needs to be expanded. For instance, which turbines were chosen for assessment, and what were the criteria for this assessment? Also, it seems that for these turbines, only individual power coefficient changes were assessed. Is this because the turbines were randomly apart from each other?

**Lines 620-630 in the original manuscript corresponded to a discussion on the impact of terrain on the power coefficient ( $C_p$ ) of a turbine simulated in isolation. Figure 19, which shows the wind farm layout, now highlights the turbines simulated in isolation. With the selection of the eight turbine locations, I was just trying to represent the geographic range of the wind farm. In the original manuscript, I only used two of the isolated turbines in unstable conditions and four of the isolated turbines in stable conditions to assess the impact of terrain on  $C_p$ . The original manuscript was not clear about how this subset of isolated turbines was selected. In the nominal  $C_p$  curve, which informs the performance curves used in the simulations as described in Section 2.3,  $C_p$  varies just 0.1% between 7.5 m/s and 8.5 m/s. In the original manuscript I only considered the isolated turbines operating within this wind speed range, leaving just two for unstable conditions and four for isolated conditions. The variable ground elevation across the wind farm causes significant wind speed variations through the wind farm (the wind speed varies much less in the flat terrain simulations, so none of the flat terrain isolated turbine simulations were filtered out). While answering this reviewer comment, I revisited this filtering criterion and found that the nominal  $C_p$  curve still only varies 1.0%**

**between 7.0 m/s and 9 m/s. I decided that this amount of variation was small enough for this exercise, and I changed the filtering criterion accordingly. Now the analysis includes 6 isolated turbines from simulations of the real terrain. The text in the revised manuscript reflects these changes. Here is the new full paragraph, which is redlined in the manuscript:**

It is somewhat less straightforward to assess the effect of terrain on turbine efficiency in this case compared with the idealized cases. This is due to the variability of the terrain in combination with the fact that, unlike the  $C_p$  curve in Fig. 2, the  $C_p$  curve of a real wind turbine is not constant over a wide range of wind speeds. That said, the maximum variation along nominal  $C_p$  curve between 7 m/s and 9 m/s is just 1%. In the following discussion, this operating range is labeled the “nearly flat” part of the nominal  $C_p$  curve (again, the nominal  $C_p$  curve informs the  $U_{disk}$ -based turbine performance look-up tables used in the simulations). We simulated 8 of the 94 turbines in isolation; these turbines, which are spread across the wind farm, are highlighted with light blue dots in Fig. 19a. When simulated on the real terrain, whether in the stable or unstable conditions, 6 of the 8 solitary turbines end up on the nearly flat part of the nominal  $C_p$  curve. In stable conditions, the two northernmost isolated turbines are outside the nearly flat range, and in unstable conditions, the northernmost isolated turbine in each of the two rows is outside this range. When simulated on flat terrain, all the turbines operate on the nearly flat part of the nominal  $C_p$  curve. If we calculate  $C_p$  from the isolated and freestream simulations using Eq. (3) and limit the calculation to turbines operating on the nearly flat part of the nominal  $C_p$  curve, the average  $C_p$  for the turbines simulated in real terrain is more than 4% lower than the average  $C_p$  of the turbines simulated on flat ground – specifically, 4.4% lower in unstable conditions and 4.5% lower in stable conditions. As with wind farm efficiency, the average effect of terrain on turbine efficiency will be much lower when aggregated over the full range of wind speeds.

**I did not quite understand the following comment/question:** “Also, it seems that for these turbines, only individual power coefficient changes were assessed. Is this because the turbines were randomly apart from each other?”

**The isolated turbines are distributed across the wind farm, as you can now see in Fig 19a. In case there is any confusion about how the turbines are simulated in isolation in this study, a clarifying clause has been added in Section 2.6.**

“... we run a subset of the turbines in isolation, typically four turbines, one simulation per turbine.”

**This part of the line is new: “one simulation per turbine”.**

## Reviewer 2

This paper presents a large set of RANS simulations of atmospheric flow over one or two rows of onshore wind turbines (actuator disks) located in parallel to a quasi-two-dimensional terrain feature (hill or valley). To identify the terrain effects on both turbine-scale and farm-scale efficiencies of power generation, additional simulations for the same turbines on flat terrain are also presented. The simulation method has been validated in the author's previous publications and no further validation is given in this paper. Overall, these simulations have been designed carefully and the results are very informative, although there are a few points on which the author's discussion seems insufficient or unclear. I would therefore suggest that the paper be revised considering the following points, before it is accepted for publication.

**Thank you for this review. It has led to improvements to the paper. I respond point-by-point below.**

1. A better explanation and discussion on the mechanisms of (turbine-scale) wake recovery should be given. This is a general comment not only on this paper but also on several other papers in the literature, but I am concerned that the effects of "terrain" and "pressure gradient" seem to have been discussed almost interchangeably. In general, these effects should not be discussed interchangeably, because "pressure gradient" is only one of several things that could be induced by "terrain". More specifically, the recovery of turbine wakes (or any wakes) should be discussed based on the conservation of both "mass" and "momentum", and the effect of "pressure gradient" is only part of momentum conservation (as can be seen from the RANS equations). I think the author's explanation given in the current manuscript would be sufficient if the flow was inviscid, where the acceleration/deceleration of the flow (caused by contraction/expansion of the flow passage due to terrain) would be directly linked to favourable/adverse pressure gradients. But in the real world, where the flow is viscous, this relationship is altered by mixing (or the Reynolds stress due to turbulence). This point needs to be discussed more carefully.

**The first reviewer makes a point that overlaps with this one. The paper focuses on inviscid effects largely absent from commonly used engineering models for wind farm flows. Regretfully, in doing so I neglected to discuss terrain-induced effects that could be potentially accounted for by these models, notably those related to turbulence. Significant changes have been made to rectify this omission. These changes include the following (same list as provided to Reviewer 1 above):**

- **The Introduction now acknowledges the impact of terrain on turbulence and how this can affect wake recovery. Supporting references are included.**

- Section 3.1, which discusses the two-row wind farm simulations, now addresses the influence of turbulence on the wake recovery between the first row and the second row. More specifically, we compare terrain-induced turbulence and terrain-induced pressure with respect to their impact on case-to-case wake recovery trends. The discussion in this section is based on the results of control volume analyses of the RANS solutions used in Section 3.1. The control volume analyses are described in detail in the Appendix.
- Section 3.2, which focuses on blockage-related loss in single-row wind farms, now includes a sentence reporting the correlation between wind farm efficiency and freestream turbulence intensity, which is affected by terrain. The correlation is weaker than the correlation with pressure coefficient and Froude number.
- In part due to the feedback related to turbulence from the reviewers, there was a major change to the end of Section 3.1 where the paper evaluates a hybrid approach to calculating turbine interaction loss (i.e. combine results from freestream simulation of terrain with wind farm simulation without terrain). The evaluation reflects the fact that in practice a hybrid approach may account for terrain-induced turbulence. This is now acknowledged in the revised manuscript. The revision also now includes results from testing a second hybrid approach. The errors from the second hybrid approach are notably smaller on average than the errors from the first. Based on the above, I decided to shorten the write-up on the evaluation of the hybrid approaches and soften the related conclusions.
- There are other smaller additions, including a few related to the ability of engineering models to account for terrain-induced turbulence in Section 3.1 (twice) and Section 4.1. The revised manuscript also acknowledges the impact of the much higher background turbulence on wakes in the main valley case (Case J).

These additions materially increased the length of an already long paper, but I believe they are needed to sufficiently address the reviewers' reasonable concerns regarding this point. Much of the additional content is in the Appendix.

As for the request for a discussion on the mechanisms of wake recovery, the Appendix, which analyzes the various contributors to wake recovery in the two-row simulations, discusses a number of the important factors at play, including mass conservation and the turbulent transport of momentum, along with terrain- and wind-farm-induced pressure gradients.

2. Somewhat related to the above point, I think the author's definition of "blockage" (Lines 64 to 68) is a little unclear. Here the author states that these terms "refer

to the inviscid response of the flow to the obstruction” but I think this “inviscid response” may need to be either rephrased or expanded. My main questions are: (1) Why does this need to be specifically about “inviscid” response? (2) Do we really need to define “blockage” in this way, which seems different from its traditional definition of “blockage” in aerodynamics? I understand that the blockage-related terms have been used in different ways (especially over the last 10 years since the concept of “wind farm blockage” was introduced by the author and other people) and I appreciate that here the author is trying to define how these terms are used in this paper specifically, but traditionally, people who work on turbine aerodynamics (especially those who test a turbine in a wind tunnel) tend to consider “blockage” as the ratio of the turbine’s rotor swept area to the cross-sectional area of the flow passage (e.g. wind tunnel). From their point of view, the “blockage” is zero when the flow passage is not constrained laterally, but the turbine still decelerates the flow through its rotor swept area (i.e. “induction” is non-zero even when “blockage” is zero). The author’s definition of “blockage” seems to contradict this traditional view, so this point needs to be explained more carefully.

**There is some overlap between point #2 and the point below, or least some overlap in how I would like to respond to the two points, so I will respond to point #2 after the next point (#3).**

3. Related to the above point, I think the author’s definition of “induction” (Lines 68 to 69) may also need some modifications. Here the author states that the induction is “the turbine-blockage-related wind speed reduction upstream of the turbine” but I think “turbine-blockage-related” can be confusing (especially to turbine aerodynamicists, for the reason described above). To avoid this confusion, I think it would be better to say that the induction is “wind speed reduction induced by the thrust force of a turbine (or turbines)”. Also, it would be worth noting that “induction” is often defined not only for a single turbine but also for a group of turbines (or a wind farm). My personal opinion is that the turbine-scale and farm-scale “blockage” discussed in this paper (and several other papers in the literature) should be referred to as turbine-scale and farm-scale “induction” instead.

**Short response: I have added text to clarify the definitions of blockage and induction in the revised manuscript. The text is redlined in the paragraph spanning lines 71-80.**

**Longer response:**

**Before I first started publicly presenting on this subject in 2017, I spent some time mulling over how to label the phenomenon that I eventually came to call wind farm**

blockage. The term “blockage” had been used in the wind literature before, but the word “induction” was also used to refer to a similar effect. However, so far as I was aware, “induction” was almost exclusively used in the context of an individual rotor and almost always referred to an effect on wind speed (there are, admittedly, two examples of papers from 2017 referring to an induction zone [1] or induction region [2] of lower wind speeds upstream of a wind farm, but in both cases the wind speed slowdown is attributed to “blockage”). In contrast, there were a number of papers discussing the “blockage” of an arrays of turbines, including [3][4]. Further, the term “blockage” more clearly evokes what I consider to be perhaps the most important aspect of the phenomenon: the fact that the oncoming flow deflects and is forced to go around, at least to a degree, the obstruction/turbine(s). For these reasons, I went with “blockage” over “induction”. I have not changed my view. At the same time, I consider the personal preference of the reviewer on this subject to be reasonable – I would not try to change it. I am eager, however, to address the reviewer’s specific concerns expressed in points #2 and #3. I do so below and in the manuscript.

The reviewer had some concerns about how “blockage” and “induction” are defined in the original manuscript. I will address these here one at a time, blockage first.

I think the reviewer is right: The definition of “blockage effects” given in the original manuscript (“the inviscid response of the flow to the obstruction”) should be improved. The approach I have taken is to add to the definition rather than scrap it. I believe this definition is consistent with how the term is frequently used in the literature. I write “used” because blockage is usually not explicitly defined. It seems to me that the term blockage, as used in the wind energy community, often refers to the flow features missed by the traditional wake models because they do not directly include pressure and buoyancy in their governing equations. I’m not entirely comfortable using that definition, and I also think “inviscid response” is more concise.

The reviewer writes that the definitions of blockage and blockage effects are “a little unclear”; if the critique is suggesting that the definitions would benefit from more specificity, then I have to agree. I have addressed this shortcoming by adding specific examples of inviscid effects, focusing on those most relevant to the manuscript. Here is the current text, much of it new:

“*Blockage* is an obstruction to the otherwise free flow of air. In this paper the obstruction relates to either a single turbine or a group of turbines. *Blockage effects* refer to the inviscid response of the flow to the obstruction. Perhaps the most salient blockage effect is the partial diversion of the flow around the turbine or turbines. The divergence of the streamlines starts upstream of the obstruction and directly connects

with an upstream wind speed reduction via continuity. Further, the vertical deflection of the flow can perturb the stably stratified atmosphere in such a way as to significantly modify the blockage-related slowdown upstream of a wind farm (Lanzilao and Meyer, 2024)”

**I hope the new text also helps clear up confusion about what is meant by “turbine-blockage-related” in this passage: “... *turbine blockage* refers to blockage from an individual turbine. *Induction* is the turbine-blockage-related wind speed reduction upstream of the turbine.” Just in case, I have added the following to the end of the sentence based on the recommendation from the reviewer: “alternatively stated, it is the upstream wind speed reduction induced by the thrust force from an individual turbine.” I have purposely added the word “individual” and left off the recommended “(or turbines)” to keep the definition of “induction” consistent with how it is used in the paper. To be clear, the revised manuscript still includes the original definition. I wish to keep the definition because, among other things, it aligns well with the physical explanation offered for some terrain-related trends in calculated power coefficient. Also, there is precedent in the literature for connecting blockage with induction, including [5][6]. That said, I do not wish to cause confusion, so I have also included the recommended definition.**

Finally, I want to acknowledge the reviewer’s concerns about the use of the term “blockage” rather than “induction” in this paper and other papers on this subject. I obviously prefer the term blockage over induction for the reasons already given; however, I admit that its use in the analysis and description of wind farm flows is not without drawbacks. The term “blockage” is historically much more commonly used in internal flows, especially wind tunnel flows, where it usually takes on a specific meaning (ratio of blocked area to cross-sectional area of the test section of the tunnel).

It was in the context of internal flows that I first came across this term. Early in my career I worked in axial compressor aerodynamics and blockage came up often, but it meant more than just a reduction in the effective flow area in the annulus. A primary effect of blockage was to deflect approaching flow around the obstruction (which was typically a hub separation or tip clearance flow) forcing a spanwise redistribution of the flow with significant performance consequences. This use of the term “blockage” – an obstruction diverting flow, causing performance changes – would not be unfamiliar to those using the term in the analysis of wind farm flows.

Separately, there are examples of the term blockage used in external flows. A Google search indicates that the term “orographic blockage” is used in many papers, though I suspect that in some of them, perhaps most of them, “blockage” is actually referring to “blocking”, which typically involves specific atmospheric

conditions and a stagnant pool of air in front of the obstruction – not really analogous to what we are referring to when we use the term “wind farm blockage”.

The term “blockage” is commonly used in analyses of tidal turbines and tidal turbine arrays. This might be the closest relative to the use of the term blockage in wind farm flows. One might argue that blockage in the context of tidal turbines is more analogous to wind tunnel blockage, with the free surface acting like the top of the wind tunnel, but one could also argue that the free surface is analogous to a capping inversion and stratification above the atmospheric boundary layer, the presence of which is believed to significantly influence wind farm blockage effects. That said, tidal turbines are laterally constrained in channels; wind farms are not.

In the end, I have to concede that “blockage” is an imperfect term, and if I were a wind turbine aerodynamicist specializing in wind tunnel experiments, I would probably be annoyed with how the term is used in the context of wind farm flows. Nevertheless, the term is now widely used in the wind industry and in the wind energy literature – usually in a way that is similar to how it is used in this paper. In the absence of a term that is clearly better, I am not inclined to change it here. The best we can do is define the term and use it in a consistent way throughout the paper.

4. Line 60: “Other research suggests that...” I think a few references should be cited for this.

The references are in the paragraph that starts, “In the LES results reported in Troldborg...” In an early draft, this paragraph came immediately after the text you flagged. However, in a later draft I added, in between, the paragraph with the blockage-related definitions. To address this issue, I have added a couple words to the flagged text:

Other research, discussed below, suggests that...”

5. Equation (1): Please mention what the suffix “WOA” stands for.

“WOA”, which stood for Witch of Agnesi, had been replaced with “ground” in Eq. 1 in the revised manuscript.

6. Figure 4 (and other similar figures): Please explain more explicitly what “at hub height” means. I guess these contour plots of wind speed reduction are on the surface that is 115 m (hub height) above the ground everywhere, i.e., this surface is also curved if the ground is curved, but this is not very clear from the figure caption or the main text.

The other reviewer flagged up the same issue. There is a paragraph at the beginning of the results section that specifically defines what is meant by “wind speed” and

**“pressure” in the section. In the revised manuscript, this paragraph also includes the definition of “height”:**

This section also includes many references to *height*, which here means the vertical distance above the local ground level. For example, a hub-height surface is one where all points on the surface are 115 m directly above the local terrain.

**I also added a couple mentions of hub-height surfaces later in the section to clarify what is meant by plotting the horizontal variation of a quantity “at hub height”.**

7. Table 1: The power coefficient  $C_P$  presented here is a “turbine-scale”  $C_P$  defined based on  $U_{\text{inf,disk}}$  (Equation 3). But I think it would be informative to also present a “global” or “overall” power coefficient (say,  $C_{P,\text{global}}$ ) defined based on a single reference wind speed (e.g. 9 m/s) that is the same for all cases, as a metric for the overall farm power.

**I have added a column with wind farm power coefficient.  $C_{P,WF}$  is the sum of the power of the turbines divided by the sum of  $0.5 \cdot \rho \cdot A \cdot U_{\text{disk}}^3$  for all the turbine locations. I have mixed feelings about including this column. The quantity is equivalent to  $\eta \cdot C_P$ , both of which are already in the table. One could argue then that  $C_{P,WF}$  does not convey additional information. That said, one could also argue that including  $C_{P,WF}$  highlights the point that the overall energy conversion efficiency of the wind farm includes the efficiency of the turbines and the turbine interaction efficiency of the array, and if terrain affects both turbine and array efficiency, the multiplicative effect is different than one might appreciate if they looked at only one of the efficiencies. I only make one reference to  $C_{P,WF}$  in the revised manuscript, at the end of the second paragraph in Section 4.1.**

8. Line 426: Here it is noted for the first time that the main difference between Cases J and L is the prescribed geostrophic wind speed. I think this information (geostrophic wind speed) should be included earlier in Table 1.

**This has been added to the table.**

9. Line 449: “the lower wind speed case exhibiting hill-induced gravity waves with longer wavelengths” Is this correct? It looks like Case K has a “shorter” wavelength.

**Well spotted. I have corrected the error in the revised manuscript.**

**Final note: A colleague while reviewing the paper flagged the odd spike in the  $C_T$  curve in Figure 2 at close to 9.8 m/s:**

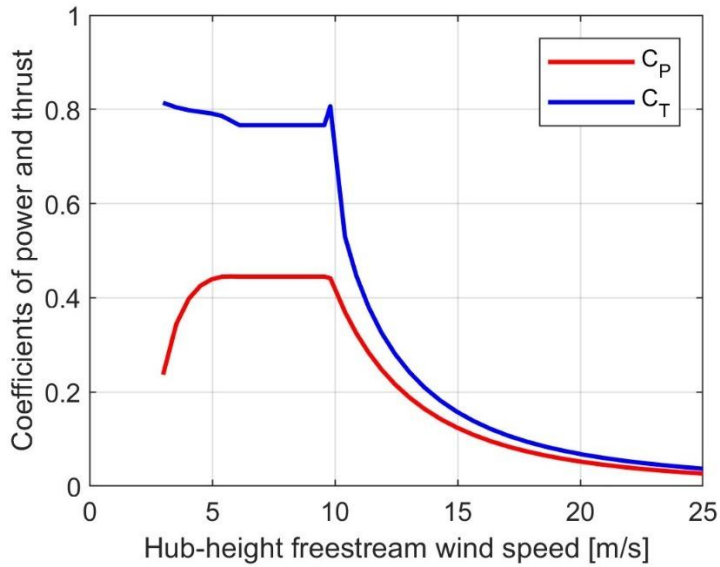

The above is the original IEA-3.4-130 curve ([https://github.com/NREL/turbine-models/blob/main/turbine\\_models/data/Onshore/IEA\\_Reference\\_3.4MW\\_130.csv](https://github.com/NREL/turbine-models/blob/main/turbine_models/data/Onshore/IEA_Reference_3.4MW_130.csv)) reference in the paper; before I used it in this study, however, I removed the spike, which involved editing just one entry in the table behind the curve. Figure 2 now reflects the  $C_T$  curve that was actually used in the study:

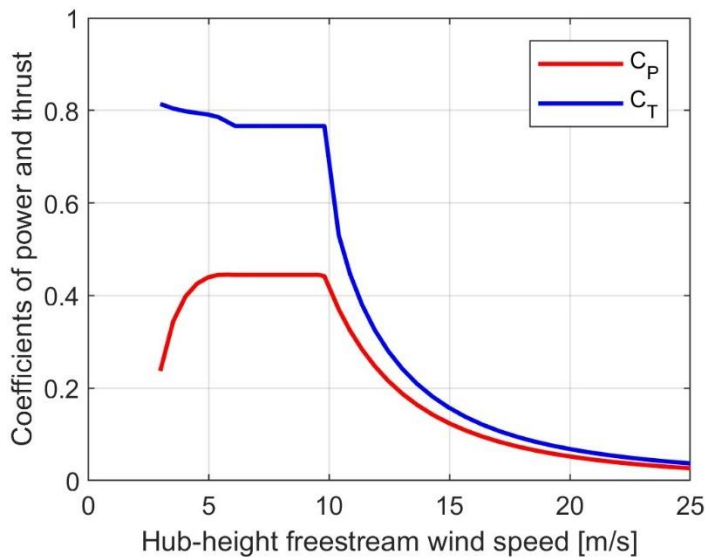

[1] Forsting, A.R.M.; Troldborg, N.; Gaunaa, M. The flow upstream of a row of aligned wind turbine rotors and its effect on power production. *Wind Energy* 2017, 20, 63–77, doi:10.1002/we.1991.

[2] Wu, K.L.; Porté-Agel, F. Flow adjustment inside and around large finite-size wind farms. *Energies* 2017, 10, doi:10.3390/en10122164.

[3] Ebenhoch, R.; Muro, B.; Dahlberg, J.A.; Hägglund, P.B.; Segalini, A. A linearized numerical model of wind-farm flows. *Wind Energy* 2016, doi:10.1002/we.2067.

[4] Allaerts, D.; Meyers, J. Gravity waves and wind-farm efficiency in neutral and stable conditions. *Bound. Layer Meteorol.* 2017, 166, 269–299, doi:10.1007/s10546-017-0307-5.

[5] Medici, D.; Ivanell, S.; Dahlberg, J.A.; Alfredsson, P.H. The upstream flow of a wind turbine: blockage effect. *Wind Energy* 2011, 14: 691-697, doi:10.1002/we.451

[6] Nishino, T.; Draper, S. Local blockage effect for wind turbines. *J. Phys. Conf. Ser.* 2015, 625, doi:10.1008/1742-6596/625/1/012010.

# A numerical study of the influence of terrain on wakes, blockage, wind farm efficiency, and turbine efficiency

James Bleeg<sup>1</sup>

<sup>1</sup>Group Research and Development, DNV, Bristol, BS1 6EW, UK

5 *Correspondence to:* James Bleeg (james.bleeg@dnv.com)

## Abstract.

This study investigates the interplay of terrain, blockage, and wake effects using Reynolds-Averaged Navier-Stokes (RANS) simulations of 35 different combinations of terrain, wind farm layout, and atmospheric conditions. The terrain includes two idealized solitary ridgelines, an idealized valley, and flat ground. The wind farms comprise one or two rows of closely spaced turbines parallel to the terrain feature. We simulate these idealized wind farms in conventionally neutral boundary layers of different heights. The set of simulations also includes an existing onshore wind farm located along a ridgeline and run with stable and unstable surface conditions. The horizontal variation of the ground elevation (i.e. terrain) has a large influence on wake and blockage effects in this study. In addition, the predicted wind farm efficiency and turbine efficiency (power coefficient) vary significantly depending upon the terrain in the simulation and the position of the wind farm relative to the terrain. For single-row wind farms the predicted effect of terrain on wind farm efficiency can exceed 4% – for the simulated conditions. The separate but correlated effect of terrain on individual turbine efficiency is of a similar magnitude. Analysis of the results indicates that there are multiple physical drivers behind the efficiency trends, including streamwise pressure gradients and inviscid effects related to buoyancy. Energy prediction methods that do not account for these drivers have an elevated risk of producing large errors – at least at wind farms similar to those evaluated in the study.

## 20 1 Introduction

An energy yield analysis for a planned onshore wind farm requires two types of flow simulations: freestream and wind farm. Freestream simulations include terrain but not, by definition, wind turbines; wind farm simulations include turbines but usually not terrain. The objective of a freestream flow analysis is to translate processed wind measurements, typically taken at just a few on-site locations, to the expected freestream wind conditions at each one of the planned turbine locations. Together with a turbine power curve, these wind conditions are used to estimate the energy yield for each turbine were it to operate in isolation. The sum of the standalone turbine energy yields is called the gross energy of the wind farm. A wind farm flow analysis calculates how wakes and blockage modify the wind conditions experienced by the turbines. More to the point, it quantifies for each turbine how much the energy yield changes when the turbine is operating in the wind farm compared with isolated operation. This change is known as a turbine interaction loss, which is usually the largest loss

30 contributing to the difference between the gross and net energy of a wind farm. While the effect of terrain on freestream (i.e. turbine-free) flow is a major consideration in energy yield assessments, the effect of terrain on wind farm flow – on wakes and on blockage – gets much less attention.

**Deleted:** is usually neglected

35 Several papers published over the last fifteen years report results indicating that hills can substantially affect wind turbine wake recovery. These include studies based on Reynolds-Averaged Navier-Stokes simulations (Politis et al., 2012), large-eddy simulations (Shamsoddin and Porté-Agel, 2018a; Liu and Stevens, 2019; Patel et al., 2024), and wind tunnel measurements (Tian et al., 2013; Hyvarinen et al. 2018). The Shamsoddin and Porté-Agel (2018) paper also validated a pressure-gradient-sensitive reduced-order wake model against the hill large-eddy simulations (LES). Based on the validation and a follow-on sensitivity study, the authors concluded that hill-induced streamwise pressure gradients can have a strong  
40 influence on wake recovery – with favorable pressure gradients on the windward side of the hill promoting wake recovery and adverse pressure gradients on the leeward side slowing wake recovery. (A pressure gradient is favorable when pressure decreases in the direction of flow; it is adverse when pressure increases in the direction of flow.) Dar and Porté-Agel (2022a) further developed the reduced-order model and validated it against wind tunnel measurements of escarpment-affected wake flow. The results also pointed to the significant influence of terrain-induced pressure gradients on wake recovery.

45 Additional studies provide more direct evidence of streamwise pressure gradients influencing turbine wakes. Cai et al. (2021) varied the inclination of the floor of a wind tunnel to induce streamwise pressure gradients just downstream of a model wind turbine. Measured streamwise pressure variation was strongly correlated with and likely the cause of substantial differences in wake recovery. Favorable pressure gradients (FPGs) promoted wake recovery, and adverse pressure gradients (APGs) did the opposite. Bayron et al. (2024) induced streamwise pressure variation by adjusting the wind tunnel ceiling just  
50 downstream of the model turbine. The wake recovery was much slower in the APG wind tunnel configuration compared with the FPG configuration, with the zero pressure gradient (ZPG) wake recovery rate in between. In addition, the wake was vertically thicker and higher in the APG case compared with the ZPG case. The opposite trend was evident in the FPG case. Finally, Zhang et al. (2023) induced streamwise pressure gradients in LES by inclining the upper and lower walls to vary the  
55 cross-sectional areas of the domain along a row of four turbines aligned with the oncoming flow. They found that APGs made wakes deeper and wider, and FPGs did the opposite.

Beyond pressure, terrain can also affect turbulence, which influences wake recovery. Multiple papers have connected complex terrain with increased turbulence and, in turn, faster wake recovery (Politis et al., 2012; Dar and Porté-Agel, 2022b; Yang et al., 2015; Zhang et al., 2024).

60

Collectively, these studies show that terrain can substantially influence wake recovery. By implication, terrain can influence how much a turbine wake affects the wind speeds experienced by turbines located downstream, which affects wind farm

**Deleted:** -induced streamwise pressure gradients

efficiency. Other research, [discussed below](#), suggests that the influence of terrain on the wake from an individual turbine also affects the wind conditions at the turbine itself. In other words, terrain can change turbine induction and thereby turbine power coefficient (i.e. individual turbine efficiency).

70 Before proceeding we offer a brief aside to define the blockage-related terms used in this paper. *Blockage* is an obstruction to the otherwise free flow of air. [In this paper the obstruction relates to either a single turbine or a group of turbines.](#) *Blockage effects* refer to the inviscid response of the flow to the obstruction. [Perhaps the most salient blockage effect is the partial diversion of the flow around the turbine or turbines. The divergence of the streamlines starts upstream of the obstruction and directly connects with an upstream wind speed reduction via continuity. Further, the vertical deflection of the flow can perturb the stably stratified atmosphere in such a way as to significantly modify the blockage-related slowdown upstream of a wind farm \(Lanzilao and Meyer, 2024\).](#) The terms “blockage” and “blockage effects” are often used interchangeably in the literature, and we will do the same here. *Wind farm blockage* refers to blockage from an array of wind turbines, and *turbine blockage* refers to blockage from an individual turbine. *Induction* is the turbine-blockage-related wind speed reduction upstream of the turbine; [alternatively stated, it is the upstream wind speed reduction induced by the thrust force from an individual turbine.](#) *Induction factor* is the fractional amount by which the wind speed at the rotor face of an isolated turbine is lower than the freestream wind speed.

In LES results reported in Troldborg et al. (2022), the power coefficient of a standalone turbine was found to be sensitive to terrain-induced streamwise gradients. The turbine in this study was at the top of a ridgeline, and different streamwise gradients were achieved by varying surface roughness, which affected the separation downstream of the ridge. In simulations where the hub-height freestream wind speed downstream of the turbine location increased with distance from the turbine, the efficiency of the turbine was higher. When the simulated freestream wind speed decreased with distance downstream of the turbine, the efficiency was lower. The findings were similar in Zengler et al. (2024), a sensitivity study run with a Reynolds-Averaged Navier-Stokes (RANS) model, where a single turbine was simulated atop various idealized hill geometries with different surface roughnesses. In both of these studies, streamwise variation in the freestream wind speed downstream of the turbine was found to correlate with changes in induction factor and in turn power coefficient. Dar et al. (2023) used wind tunnel experiments to investigate the effect of streamwise pressure gradients on wakes and power performance. Fifteen different tunnel floor configurations were tested. These configurations induced streamwise pressure gradients, progressing from a strong APG case to a ZPG case and through to a strong FPG case. Pressure was not directly measured in the experiments, rather it was inferred from the measured freestream wind speeds. In each configuration, the inferred freestream pressure gradient was nearly constant over a distance covering the induction zone of the model turbine through to the far wake. As the freestream streamwise pressure gradient increased, from the strong FPG case through the ZPG case and on to the strong APG case, the wake deficits generally also increased, while power coefficient generally decreased. For a given pressure gradient magnitude, an APG generally reduced turbine performance more than an FPG increased it. In an LES-

Deleted: ,

Deleted: and

Deleted: *i*

based sensitivity study, Revaz and Porté-Agel (2024) simulated a standalone turbine atop various idealized hills. APGs downstream of the turbine increased wake deficits, which in turn increased turbine induction factor, decreasing power coefficient.

The impact of terrain on wind farm and turbine efficiency is still a relatively new field of study, with many opportunities to broaden the scope of the literature. Most of the research to date concerns wakes from a single turbine or a few aligned turbines. The results imply an effect of terrain on turbine interaction loss, but there is little in the literature directly making this connection through the analysis of full wind farms. In addition, the studies do not include the effect of buoyancy; the simulated and/or measured flow is always neutrally stratified. Yet wind farms are subjected to stably stratified flow all the time – if not within the boundary layer, then above it. This is significant because buoyancy effects profoundly modify the response of flow to terrain (Baines, 2022; Vosper, 2004; Blegg et al., 2015b; Radünz et al., 2025) and to wind farms (Lanzilao and Meyer, 2024). Finally, the peer-reviewed literature does not address the potential impact of terrain on wind farm blockage, which can have a material impact on the wind speeds experienced by turbines in an array (Blegg et al., 2018).

This contribution takes aim at these gaps. Using a RANS solver, we simulate full wind farms in different types of idealized terrain. The simulated boundary layers are neutral but with overlying stratification. From these simulations we assess the influence of terrain on both wake *and* blockage effects. In turn, we evaluate the impact of terrain on turbine interaction loss across the wind farm. We also assess the impact of terrain on individual turbine efficiency. Finally, to better understand how the findings from these idealized simulations might translate to the field, we run additional simulations of a currently operating wind farm with inflow conditions derived from a numerical weather prediction model.

The next section of this paper, Section 2, explains the numerical approach used in this study. Section 3 presents the results, highlighting the effect of terrain on wakes, blockage, and energy conversion efficiency. The section also explores the main physical drivers behind the trends with terrain. Section 4 discusses the practical implications of the results and the limitations of the study. And lastly, Section 5 summarizes the main findings.

## 2 Numerical approach

This section describes the flow modeling used in the investigation. It describes the flow equations, boundary conditions, and domain, as well as how wind turbines are represented in the simulations. It also includes information about the simulated wind farms, atmospheric conditions, and terrain – and a description of the mesh used to resolve these features. Lastly, the section explains the types of simulations run and how they are post-processed to assess whether and to what degree turbine and wind farm performance are influenced by terrain.

135 There are two types of wind farms in this study: idealized and real. The numerical analysis of idealized wind farms –  
comprising 31 different combinations of turbine layout, terrain, and inflow conditions – represents the heart of the study. The  
one real wind farm in the investigation involves far fewer simulations, the results of which are included here as a check on  
the representativeness and real-world applicability of the idealized wind farms results. This section applies to both types of  
wind farms; however, the subsections covering terrain (2.2), wind farm layouts (2.3), and atmospheric conditions (2.4) apply  
140 primarily to the idealized wind farms. We address these three topics for the real wind farm in results section 3.4.

### 2.1 RANS model

We constructed and customized the numerical model within STAR-CCM+, a general-purpose computational fluid dynamics  
code (Siemens PLM, 2022). The mass and momentum equations are steady-state incompressible RANS equations. The  
energy equation is a transport equation for potential temperature, and the turbulence equations are standard  $k-\epsilon$  with  
145 modified coefficients. Buoyancy is included in the vertical momentum equation via a shallow Boussinesq formulation; the  
effect of buoyancy on turbulence is modeled with production terms in the turbulence equations. The horizontal momentum  
equations include the Coriolis force, and the vertical momentum equation has a source term designed to damp gravity waves  
near the lateral and top boundaries. More details about the flow model may be found in Bleeg et al. (2015a and 2015b).

150 We represent the wind turbines with simple actuator disks. The thrust and torque, applied as body forces at each disk, are  
functions of the average axial velocity across the disk ( $U_{disk}$ ). The derivation of these functions is discussed further in  
Section 2.3.

This model for wind farm flows has been validated against field observations related to wake and/or blockage effects at 17  
155 wind farms, including those publicly reported in Bleeg et al. (2018), Montavon et al. (2021), Montavon et al. (2023),  
Montavon et al. (2024), and Bleeg et al. (2024).

### 2.2 Terrain definition and domain

There are two primary terrain types in this study: flat and hill. In flat simulations, the ground elevation is uniformly equal to  
0 m. In hill simulations, the ground elevation is a stretched Witch of Agnesi function (Eq. (1)) extruded north and south to  
160 create a quasi-two-dimensional hill in the three-dimensional RANS simulation. The height of the hill,  $h_c$ , is 370 m, and the  
base of the hill is at  $z = 0$  m. The half-height, half-width of the hill,  $a$ , is 2100 m in all hill cases but one, where  $a$  is set to  
1050 m. The maximum slopes of these two hills are  $6.5^\circ$  and  $12.9^\circ$ , respectively. The flow does not separate from the ground  
surface in any of the simulations run with these hills. The study also includes a valley terrain type, with the valley being a  
mirror image of the quasi-2D hill ( $h_c = -370$  m).

165

$$z_{ground} = \frac{h_c a^2}{a^2 + x^2} \quad (1)$$

The computational domain, depicted in Fig. 1, is large compared to the scales of the wind farm and hill profile. The length of the domain is 100 km with the western boundary at  $x = -60$  km and the eastern boundary at  $x = 40$  km; the center of the quasi-2D terrain feature is at  $x = 0$  km. The width of the domain is 40 km with the northern boundary at  $y = 20$  km and the southern boundary at  $y = -20$  km. The top boundary is at  $z = 17$  km. The wind direction at hub height is approximately  $270^\circ$ , and the geostrophic wind is from the northwest. Thus, the western and northern boundaries are inflow boundaries, where we specify velocity, turbulence quantities, and potential temperature. The southern and eastern boundaries are outflow boundaries, where we specify static pressure. The top boundary is a slip wall set to a constant potential temperature. The bottom, ground boundary is a no-slip wall with a uniform aerodynamic roughness length of 0.028 m and a constant potential temperature of 283 K. The ground elevation is smoothed near the north and south boundaries, consistent with the standard practice for simulating flow over terrain with this RANS model.

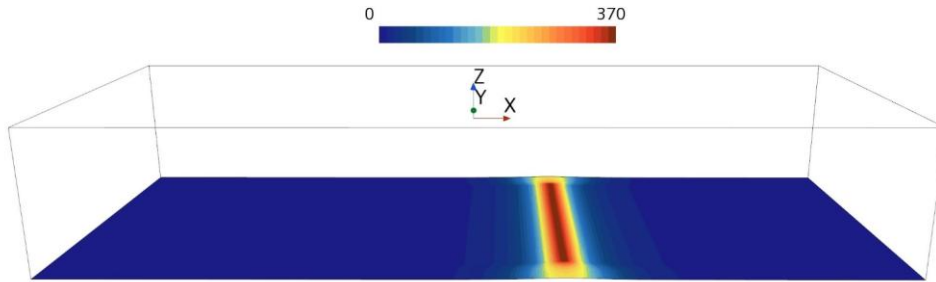

Figure 1: Simulation domain with the ground surface colored by elevation (m).

### 2.3 Wind farm and turbine definitions

The idealized wind farms are organized in rows. Each row has 34 turbines, and the hub-to-hub spacing between neighboring turbines is two rotor diameters ( $2D$ ). The rows are north-to-south, perpendicular to the flow, and located either atop the hill crest,  $15D$  downstream of the crest, or  $15D$  upstream of the crest. The inter- and intra-row spacing is intended to be representative of wind farms in places with one dominant wind direction sector or two opposing dominant sectors. At these wind farms, the spacing between turbines in a row is typically  $1.5D$  to  $3.0D$ ; the distance between rows is typically  $10D$  to  $20D$ . Such wind farms are common in Brazil, Chile, the U.S. Southern Plains, the western U.S., and the Taiwan Strait. Tight spacing between turbines is also common when a wind farm is located along a ridgeline.

The turbine model has a hub height of 115 m, a rotor diameter of 160 m, and a rated power of 5.1 MW. The  $C_T$  and  $C_P$  curves, depicted in Fig. 2, are from the IEA-3.4-130 onshore reference turbine (Bortolotti et al., 2019).

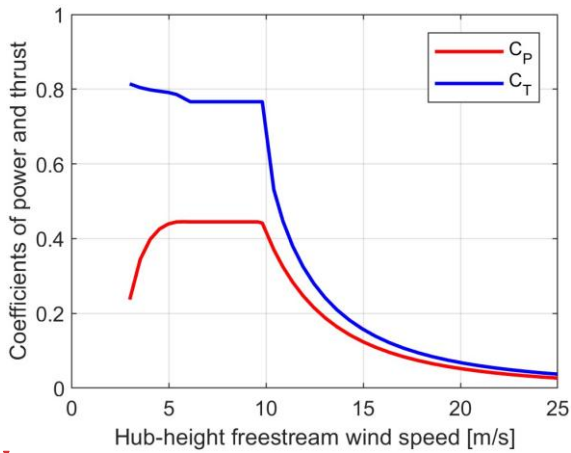

Figure 2: Nominal power and thrust coefficient curves for the wind turbine model simulated in the idealized wind farms.

These curves, which are functions of hub-height freestream wind speed, must be converted to functions of  $U_{disk}$  to be used in the wind farm simulations. We make the conversion using a procedure similar to that described in van der Laan et al. (2014). It involves running single-turbine simulations in flat terrain over a set of wind speeds spanning the operating range of the wind turbine. In these simulations, where hub-height freestream wind speed is known, the actuator disk forces are set according to the original performance curves (Fig. 2). At the end of each simulation, we record  $U_{disk}$ . The outcome of this procedure is a set of curves for power, thrust, and rotor speed specified as functions of  $U_{disk}$ . These curves form a look-up table used to control the actuator disks during wind farm simulations and to support the post-processing of the results. We refer to this table as the turbine performance look-up table. This procedure is used to generate the turbine performance look-up tables for both the idealized and the real wind farm simulations.

The table includes an additional column, effective wind speed,  $U_e$ . For a given value of  $U_{disk}$  and corresponding values of thrust and power,  $U_e$  is the wind speed that yields the same power and thrust when using the original  $C_T$  and  $C_P$  curves. We use this quantity to help analyze the RANS results in Section 3.1.

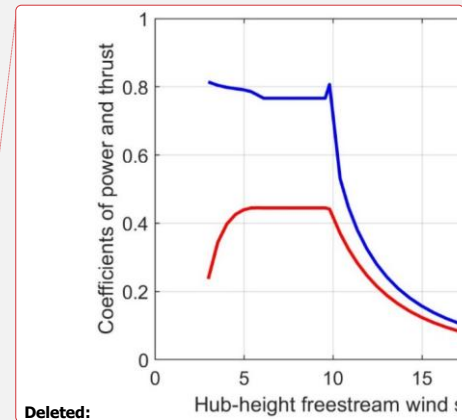

Deleted:

Formatted: Caption

## 2.4 Atmospheric conditions

The atmospheric conditions in the idealized wind farm simulations feature stable stratification overlying a neutral boundary layer. The stratification starts with a capping inversion approximately 600 m thick with a maximum potential temperature lapse rate of 10 K/km. The free atmosphere above has a potential temperature lapse rate of 3.3 K/km. Nearly all the conventionally neutral boundary layers simulated in this study use one of the two inflow potential temperature profiles depicted in Fig. 3. The primary difference between the profiles is  $z_i$ , the altitude at which the inversion starts. In one profile  $z_i$  is 640 m, in the other  $z_i$  is 960 m. We use a single-column (one-dimensional) RANS model to generate velocity and turbulence profiles that are in quasi-equilibrium with the prescribed potential temperature profile, given inputs such as latitude ( $= 43^\circ$ ), aerodynamic roughness length ( $= 0.028$  m), and geostrophic wind speed. In each case the geostrophic wind speed is set such that all the turbines in the simulated wind farm operate on the flat part of the  $C_T$  curve. The inflow profiles of velocity and turbulence are uniform above the inversion.

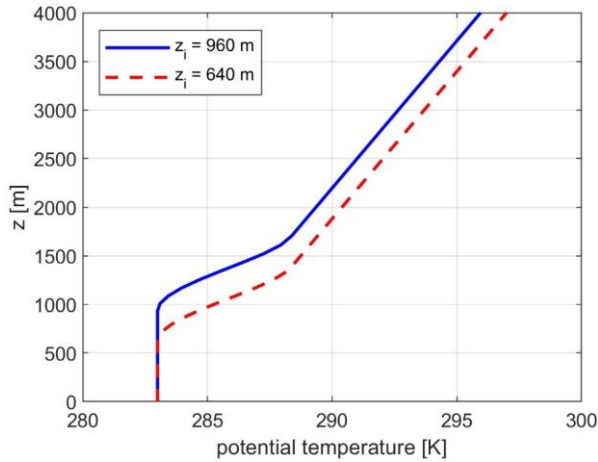

220 Figure 3: Inflow vertical profiles of potential temperature.

## 2.5 Mesh

The vertical spacing of the prismatic cells used to resolve the boundary and inversion layers relaxes from a cell height of 2 m at the ground to a cell height of 92 m or less at the top of the inversion layer. Above the inversion, the mesh further relaxes to isotropic cells with centroid spacings of approximately 200 m.

225

The horizontal mesh resolution is highest near the wind farm. The cell spacing is no more than 0.1 D within 12 rotor diameters of any turbine up to a height of 335 m. The cell spacing in close proximity to the actuator disks is 0.05 D.

## 2.6 Wind farm and turbine performance metrics

230 The ultimate aim of this study is to better understand whether and to what degree terrain influences wind farm and turbine performance. The primary performance metric for the wind farm is array efficiency, which is defined as follows:

$$\eta = \frac{\sum_{k=1}^N P_{WF,k}}{\sum_{k=1}^N P_{I,k}} \quad (2)$$

235  $P_{WF,k}$  is the power from turbine  $k$  when simulated in the wind farm, and  $P_{I,k}$  is the power from turbine  $k$  when simulated in isolation. The terms *array efficiency* and *wind farm efficiency* are used interchangeably in this paper. We also refer to  $\eta$  as a *turbine interaction loss factor*. The percent turbine interaction loss,  $L$ , is simply  $100\% \times (1 - \eta)$ .

240 Reliably calculating the values in Eq. (2) requires results from three types of simulations: wind farm (all actuator disks on), freestream (all actuator disks off), and isolated turbine (one actuator disk on). All three types are run for each combination of simulated terrain, atmosphere, and turbine layout – using the same domain, mesh, and boundary conditions. The wind farm simulation yields the  $P_{WF,k}$  values. To get the  $P_{I,k}$  values, we could run an isolated turbine simulation at each turbine location in the wind farm layout, but this is not necessary. Instead, we run a subset of the turbines in isolation, typically four turbines, [one simulation per turbine](#). Using results from the freestream simulation together with the isolated turbine results, we can determine the relationship between the freestream conditions and  $U_{disk}$  for the isolated turbines. This enables reliable estimation of  $U_{diskI,k}$  and, in turn,  $P_{I,k}$  for every turbine. As will be discussed in Section 3.3, the relationship between  
 245 freestream conditions and  $U_{diskI,k}$  can be sensitive to the position of the turbine relative to the hill profile, so when simulating two rows on a hill, two sets of isolated turbine simulations are needed, one for each row.

The primary turbine performance metric is power coefficient:

$$C_p = \frac{P_I}{\frac{1}{2} \rho A U_{\infty,disk}^3} \quad (3)$$

250  $P_I$  is the power from a turbine simulated in isolation.  $\rho$  is the density, and  $A$  is the swept area of the rotor.  $U_{\infty,disk}$  is the axial component of velocity averaged over the disk in the freestream simulation.  $C_p$  values reported herein correspond to an average of the isolated turbine simulations run for any given terrain-atmosphere-turbine-row combination. [Note that there are](#)

two types of power coefficient discussed in this paper: calculated and nominal. When referring to calculated power coefficient values (i.e. those from Eq. (3)),  $C_p$  is italicized. When referring to a nominal power coefficient curve or a value from that curve,  $C_p$  is not italicized.

The power values used in Eq. (2) and Eq. (3) are not the dot product of thrust and velocity at the actuator disk; the power instead derives from  $U_{disk}$  and the turbine performance look-up table.

### 260 3 Results

Here we present the simulation results, dividing them into four sections. Results from the idealized two-row wind farms and idealized single-row wind farms are in sections 3.1 and 3.2, respectively. These sections focus on the impact of terrain on wakes, wind farm blockage, and turbine interaction loss. The third section, 3.3, presents results from turbines simulated in isolation and focuses on the impact of terrain on the near-wake, turbine blockage, and turbine efficiency ( $C_p$ ). Results from simulations of a real wind farm are in Section 3.4.

This results section includes many plots of and references to “wind speed” and “pressure”. Here, *wind speed* is the horizontal component of velocity. *Pressure* is relative pressure. This relative pressure is equal to the absolute pressure minus the pressure field in balance with both the geostrophic Coriolis force and the inflow potential temperature profile. This section also includes many references to *height*, which here means the vertical distance above the local ground level. For example, a hub-height surface is one where all points on the surface are 115 m directly above the local terrain.

#### 3.1 Two-row wind farms

We simulate three different two-row wind farms: *flat*, *hill windward*, and *hill leeward*. The turbines in each row are arranged south-to-north with the second row directly to the east of the first row. The x-component of the distance between the rows is 15 D. In the *flat* case, the wind farm operates in flat terrain. In the *hill windward* case, the first row is on the windward side of the hill and the second row is on the crest. In the *hill leeward* case, the first row is on the crest and the second row is on the leeward side of the hill. The *hill windward* and *hill leeward* cases are run with the same inflow conditions. In the freestream simulations, the hub-height wind speed is 9 m/s at the crest, 6.2 m/s 15 D upstream of the crest and 6.8 m/s 15 D downstream of the crest. In the *flat* case, the freestream hub-height wind speed is 9 m/s across all turbine locations. In all three cases,  $z_i = 960$  m.

Terrain has a significant impact on wake recovery and upstream blockage effects in these simulations. This can be seen in Fig. 4, which shows on hub-height surfaces the percent change in wind speed due to the presence of the wind farm (flow is from left to right, as is the case in all top view plots in this paper). The wakes downstream of the *hill windward* and *hill*

Deleted: at hub height

leeward wind farms are clearly deeper than in the *flat* case. In addition, the upstream slowdowns are more pronounced and far-reaching in the hill cases, especially the *hill leeward* case. Finally, a close look at Fig. 4 reveals that the wakes in between the two rows are deeper in the *hill leeward* case than in the *hill windward* case—with the flat case in between. The case-to-case differences in the wakes from the first row can be seen more clearly in Fig. 5, which shows the percent change in wind speed relative to freestream on a vertical plane 2.5 D upstream of the second row.

290

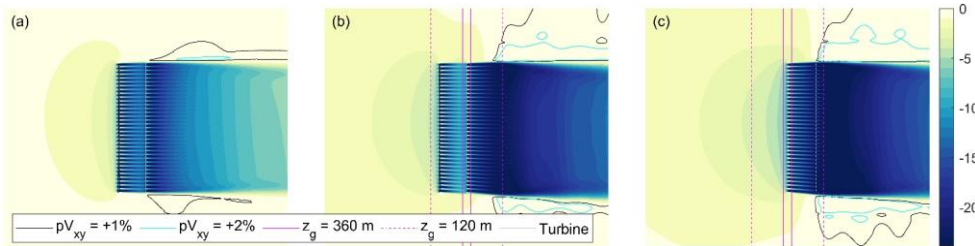

Figure 4: Top view of the percent change in wind speed relative to freestream at hub height for the *flat* (a), *hill windward* (b), and *hill leeward* cases (c). Magenta lines are ground elevation contours; the hill crest is located between the two solid magenta lines.

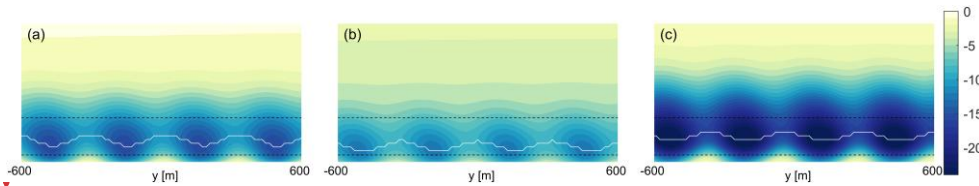

295 Figure 5: Percent change in wind speed relative to freestream on a vertical plane located 2.5 D upstream of the second row in the *flat* (a), *hill windward* (b), and *hill leeward* cases (c). Dashed lines demark the rotor layer (heights of 35 m and 195 m). The thin white lines indicate the height of the maximum wind speed deficit for each constant-y gridline in the discretized solution.

The wake and blockage trends in Fig. 4 are reflected in the row-by-row performance. This can be seen in Fig. 6. The first row in the *hill leeward* case is less efficient than the first row in the *hill windward* case, which is less efficient than that first row in the *flat* case. This order is consistent with the apparent strength of the upstream blockage effects in Fig. 4. The *hill leeward* case also has the least efficient second row; the *hill windward* case has the most efficient second row. The efficiency of the second row relative to the first row is clearly very sensitive to terrain as highlighted in Fig. 6b. A significant contributor to this efficiency trend is differences in streamwise pressure variation.

300

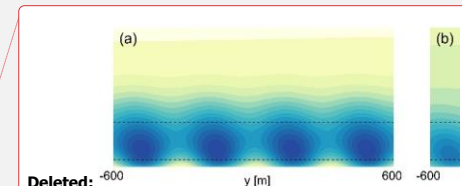

Deleted:

Deleted: 2

Deleted: The primary reason for

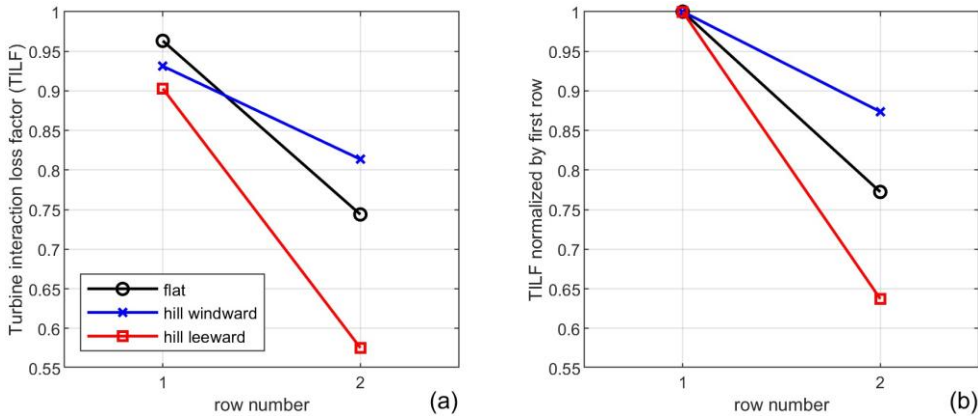

Figure 6: Turbine interaction loss factor,  $\eta$ , by row (a); turbine interaction loss factor normalized by the turbine interaction loss factor for the first row (b).

310 The hill induces substantial streamwise pressure gradients in the vicinity of the wind farm. Figure 7 shows how the freestream pressure varies along the hill profile (flow is from left to right, as is the case in all similar plots in this paper). The pressure gradient is favorable on the windward side of the hill and generally unfavorable (adverse) on the leeward side. As discussed in the Introduction, FPGs promote wake recovery; APGs do the opposite. The wakes from the first row in the *hill windward* case travel through a favorable pressure gradient before reaching the second row. The pressure drop between these  
 315 rows accelerates wake recovery, and as a result, the second row experiences less turbine interaction loss. The wakes from the first row in the *hill leeward* case travel primarily through an APG, deepening the wakes and increasing the turbine interaction loss in the second row. The freestream streamwise pressure gradient in the *flat* case is negligible, and the turbine interaction loss in the second row relative to the first naturally falls between the two other cases (Fig. 6b).

320 Terrain can also affect the trajectory of a wake. In the *hill leeward* case, the wakes from the first row are clearly higher than in the other two cases (see Fig. 5). The wakes from the first row in the *hill windward* case are slightly lower than those in the *flat* case. These differences must have some effect on the turbine interaction loss trends in Fig. 6, but the effect is probably small compared with the effect of the wake deficit differences evident in Fig. 5. The average deficit along the maximum-deficit white lines in Figure 5 is 12% for the flat case, 9.6% for the hill windward case, and 19.5% for the hill leeward case.  
 325 When these deficits are run through the turbine power curve, they translate to power loss factors of 0.68, 0.74, and 0.52, respectively. These trends strongly resemble the case-to-case variation in turbine interaction loss factor for the second row seen in Figure 6a (0.74, 0.81, and 0.57, respectively), suggesting that despite some differences in the vertical positions of the wakes between the cases, differences in the magnitudes of the wake deficits still appear to be the main driver behind the

power loss trends across these simulations. The effect of terrain on wake trajectory may be more important at wind farms located in more complex terrain.

Terrain can also affect turbulence, which influences wake recovery. The mean freestream turbulence intensity (TI) across the disk areas in the flat case is 8.6%. For the hill windward case, the freestream TI is 7.5% at the first row and 4.9% at the second row. For the hill leeward case, the freestream TI is 4.9% at the first row and 8.6% at the second row. In an effort to better understand the relative contributions of turbulence and pressure to the recovery of the wake between first and second row of turbines in these three cases, we conducted a control volume analysis (CVA) of the RANS solutions. The following is a brief summary of the analysis; a more complete description is in the Appendix.

The control volume corresponds to the rotor layer with the western surface 2.5 D downstream of the first row and the eastern surface 2.5 D upstream of the second row. The turbulent transport of momentum is the primary contributor to wake recovery in the flat case (Fig. A-2a). The wind-farm-induced pressure field, in contrast, materially works against wake recovery between the first and second row, consistent with findings reported in Bastankhah et al., 2024. In the hill windward case, the turbulent transport of momentum makes a smaller contribution to wake recovery compared with the flat case, yet there is more wake recovery in the hill windward case (Fig. A-2b). The stronger wake recovery in this case is primarily due to the significant pressure drop between the west and east surfaces. In the hill leeward case, the turbulent transport of momentum makes a smaller contribution to wake recovery than in the flat case, consistent with the larger wake deficits evident in the hill leeward case (Figure A-2c). However, the trend in turbulent diffusion is not sufficient to explain the fact that the wakes are deeper just upstream of the second row than just downstream of the first. The significant pressure rise from the western surface to the eastern surface is the primary reason for this. Lastly, the large differences in wake recovery between the hill windward and hill leeward cases are not due to hill-induced turbulence, as the contributions of turbulence to wake recovery in these two cases are about the same; it is instead differences in the hill-induced pressure fields that explains the differences in wake recovery. (The results in Fig. A-2 suggest that the vertical advection of momentum is also a substantial contributor to wake development in the rotor layers across the three cases; however, as explained in the Appendix, this contribution is linked with the contributions of pressure and the turbulent transport of momentum.) Most of the commonly used engineering models for wind farm flow include consideration of TI, and depending upon the quality and fullness of the site-specific ambient TI input data, these models may capture some of the impact of terrain-induced turbulence changes on wake recovery. However, none of the commonly used models account for terrain-induced pressure, which can have a large influence on turbine wakes.

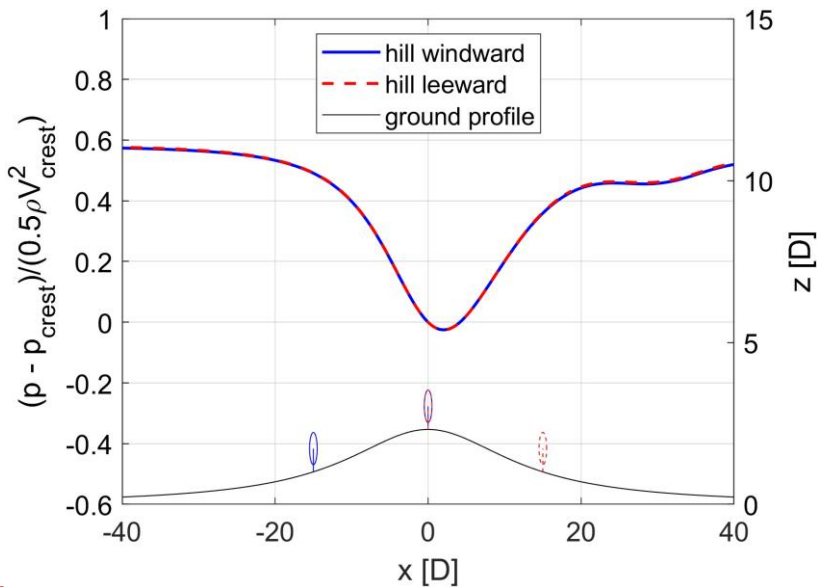

Figure 7: Freestream pressure coefficient along the hill profile at hub height in the middle of the domain ( $y = 0$  m) for the *hill windward* (blue) and *hill leeward* (red) cases. The pressure coefficient is relative to conditions at the hill crest. The thin black line is the hill profile. Turbine icons matching the legend colors represent the locations of the turbine rows for each case.

We also calculate turbine interaction loss,  $100\% \times (1 - \eta)$ , for the full wind farm. The turbine interaction loss is 14.6% in the *flat* case. It is 15.8% in the *hill windward* case and 18.5% in the *hill leeward* case. In a typical energy yield analysis, the turbine interaction loss for a wind farm in terrain would be estimated using an engineering model that does not directly include the effect of terrain on wakes and blockage. If we were to neglect the influence of ground elevation variation in this RANS-based analysis and use the *flat* case result ( $L = 14.6\%$ ) to predict the losses for the two hill cases, the losses would be underestimated, especially for the *hill leeward* case. That said, in a typical energy yield analysis, the turbine interaction loss calculation would consider how the freestream wind speed varies over the terrain.

There does not appear to be a standard approach for incorporating terrain-induced spatial wind speed variations in a wind farm flow analysis run with a model that does not include terrain. Brogna et al. (2020) adds wake deficits to the local background wind speed. Farrell et al. (2020) and Lanzilao and Meyers (2021) multiply the local background wind speed by wind speed loss factors. Here we explore both of these hybrid approaches using the freestream RANS solution for the quasi-2D hill in combination with the RANS solution for the two-row wind farm in flat terrain.

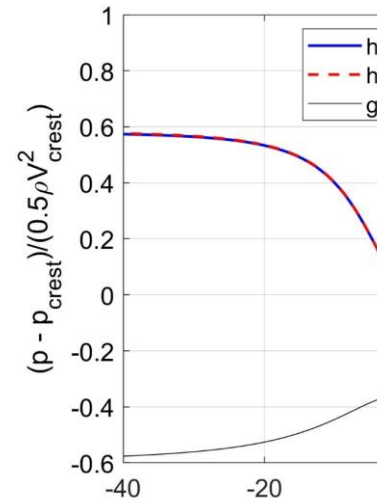

Deleted:

Deleted: one plausible hybrid

Deleted: ,

We start with the multiplicative approach used in Farrell et al. (2020) and Lanzilao and Meyers (2021). From the flat case analysis, we can determine the effective wind speed experienced by each turbine relative to the effective wind speed each turbine would experience operating in isolation  $(U_e/U_{e,i})_{flat}$ . We determine  $U_{e,i,hill}$  for each turbine from the freestream and isolated turbine simulations run with the hill terrain as described in Section 2.6. Multiplying the two sets of values yields  $U_{e,hill,estimate}$  for each turbine. As explained in Section 2.3, the  $U_e$  values can be used to look up power. These power values yield hybrid hill-flat turbine interaction loss predictions of 20.3% for the hill windward case and 9.6% for the hill leeward case. These hybrid predictions are much different from the loss values derived from simulations of the wind farms with the terrain included. Not only are the errors large, but the windward-to-leeward loss trend is dramatically reversed. Lanzilao and Meyers (2021) cautioned that the multiplicative approach may not work well when there are large variations in the background velocity, which is the case here.

If we instead add the deficits to the local background wind speed ( $U_{e,hill,estimate} = U_{e,i,hill} + (U_e - U_{e,i})_{flat}$ ), the results improve. This add-deficits hybrid approach predicts a 15.7% loss for the hill windward case, nearly matching the result from the actual hill windward case. The add-deficits prediction for the hill leeward case, however, is still too low: 10.1% vs. 18.5% for the actual case.

These results indicate that there are pitfalls in simple hybrid approaches that can lead to large prediction errors; having said that, the above examples miss an important part of how the hybrid approach would likely work in practice. Most engineering models for wind farm flows take in local TI as an input, whereas in the above example, the RANS simulation providing the wind farm flow result is run with freestream TI that is higher than the freestream TI levels at the turbine locations in the hill windward and hill leeward cases. Accounting for the hill-induced spatial variation of TI would probably improve the hybrid results – though again, the benefit would likely be limited by the fact that hill-induced pressure gradients, which are unaccounted for in most engineering models, have a larger influence on the case-to-case wake trends.

### 3.2 Single-row wind farms

We ran 28 single-row RANS-based wind farm flow analyses, varying row location, terrain, and inflow conditions. Table 1 lists the high-level results for these cases. The turbine interaction loss,  $L$ , varies a lot across these single-row wind farms, from -1.8% to +15.6%. The following pages and figures explore the RANS results in more detail in order to better understand this variation and how it relates to wakes, blockage, and terrain.

We first look at cases A-D, which are all simulated with a  $z_i$  of 960 m. Differences in wake and blockage effects across these cases can be seen in Fig. 8, which shows top views of the percent change in wind speed relative to freestream conditions at hub height (i.e. on hub-height surfaces). The wake recovery and upstream blockage effects are much different in the cases

**Deleted:**

**Deleted:** This hybrid approach does not appear to be a good option for layout optimization here....

**Deleted:**

**Deleted:** ¶

At first glance, the huge differences between the hybrid hill-flat predictions and the full wind-farm-terrain results seem hard to believe; however, the errors from the hybrid approach make more sense after considering how the wind speed varies across the hill profile in conjunction with the row-by-row efficiency numbers in Fig. 6a. The freestream wind speeds in the hill windward case are much higher at the location of the second row, on the crest, compared with the first row—with the same being true for  $U_{e,i}$  and  $P_i$ . As a result, the efficiency of the second row has a much greater influence on the overall efficiency than the efficiency of the first row. Thus in this hybrid approach, where the efficiencies come from the flat case, the low efficiency of the second row (74.4%) dominates the calculation of the overall wind farm efficiency, which in this hybrid hill-flat approach is calculated to be 79.7% – a turbine interaction loss of 20.3%. Of course in the actual hill windward case, the second-row efficiency also makes the largest contribution to the overall efficiency, but in this case the second-row efficiency is quite a bit higher (81.4%), resulting in a comparatively lower overall loss of 15.8%. In the hill leeward case, the  $U_{e,i}$  and  $P_i$  values in the first row, on the crest, are much higher than those in the second row downstream. As a result, the first row makes a much larger contribution to the overall wind farm efficiency/loss. The hybrid flat-hill prediction of the overall loss for the hill leeward case effectively weighs the 3.7% loss in the first row much more heavily than the 25.6% loss in the second row (both numbers from the flat case), yielding an overall loss prediction of just 9.6%, which is quite a bit lower than the 18.5% overall loss calculated directly from the actual hill leeward analysis. ...

**Deleted:** We have not explored other methods used to combine freestream flow over terrain with wind farm modeling without terrain. Like with wake superposition, there are likely several different methods currently in use, but unlike with wake superposition, these methods are not to our knowledge well documented in the literature. The hybrid approach used here seems reasonable, and intuitively one might expect it to at least offer an improvement over methods that completely ignore terrain-induced wind speed variations when predicting turbine interaction losses; however, in these examples, the hybrid approach makes the loss predictions much worse. For a hybrid approach to consistently work well, it would probably need to account for the fact that streamwise pressure gradients affect low-momentum wake flow more than higher-momentum freestream flow. ¶

**Deleted:** twelve of

**Deleted:** Case

with the hill compared with the flat terrain case. When the turbine row is on the crest or on the leeward side of the hill (Fig. 8a and Fig. 8c), the upstream blockage effects are much more pronounced than in the flat case (Fig. 8d), and the wind farm wake downstream is deeper. In contrast, when the turbine row is on the windward side of the hill (Fig. 8b), the wind farm wake deficit is smaller than in the flat case and the upstream blockage effect is less pronounced.

The Case A results relative to Case D are consistent with the RANS results in the master's thesis of Kashyap (2022), which found that the upstream blockage effect of an infinitely long row of wind turbines can be stronger when the row is located along the crest of a quasi-2D hill as compared to when located in flat terrain.

The hub-height plots in Fig. 8 are intended to show the effect of terrain on blockage and wakes. In this section, there are eleven of these top-view hub-height plots, which correspond to the first eleven cases in . To supplement these plots, and in consideration of the expected effect of terrain on wake trajectory, Fig. A-3, at the end of the Appendix, shows the wake deficits on constant-x vertical planes 8 D downstream of the turbine row for each of the eleven cases. These plots confirm that terrain affects the vertical trajectory of the turbine wakes, but they also indicate that the top-view hub-height plots in this section provide a reasonable representation of how the wake deficits vary from case to case through the rotor layer, at least close to the wind farm.

| Case     | Terrain     | Row location | $z_i$ [m] | $U_{in}$ [m/s] | $W_g$ [m/s] | $U_{\infty,disk}$ [m/s] | $TI_{\infty,disk}$ [%] | $L$ [%] | $C_P$ | $C_{P,Wf}$ (= $\eta C_P$ ) |
|----------|-------------|--------------|-----------|----------------|-------------|-------------------------|------------------------|---------|-------|----------------------------|
| A        | Hill        | crest        | 960       | 5.7            | 6.6         | 9.0                     | 4.9                    | 6.94    | 0.446 | 0.415                      |
| B        | Hill        | windward     | 960       | 7.9            | 9.4         | 8.1                     | 7.9                    | -0.27   | 0.456 | 0.458                      |
| C        | Hill        | leeward      | 960       | 6.8            | 8.0         | 9.0                     | 6.8                    | 9.31    | 0.421 | 0.382                      |
| D        | Flat        | N/A          | 960       | 9.0            | 10.8        | 8.9                     | 8.6                    | 1.46    | 0.444 | 0.438                      |
| E        | Hill        | crest        | 640       | 5.4            | 6.2         | 9.0                     | 4.2                    | 10.75   | 0.445 | 0.397                      |
| F        | Hill        | windward     | 640       | 8.0            | 9.4         | 7.7                     | 8.1                    | -0.01   | 0.456 | 0.456                      |
| G        | Hill        | leeward      | 640       | 6.1            | 7.0         | 8.6                     | 6.3                    | 15.61   | 0.408 | 0.345                      |
| H        | Flat        | N/A          | 640       | 9.1            | 10.9        | 9.0                     | 8.4                    | 3.23    | 0.442 | 0.428                      |
| I        | Narrow Hill | crest        | 960       | 5.7            | 6.6         | 9.4                     | 5.1                    | 8.97    | 0.437 | 0.397                      |
| J        | Valley      | leeward      | 640       | 11.0           | 13.4        | 6.3                     | 17.5                   | -1.80   | 0.477 | 0.485                      |
| K        | Hill        | leeward      | 960       | 5.7            | 6.6         | 6.5                     | 8.9                    | 3.57    | 0.421 | 0.406                      |
| L        | Valley      | leeward      | 640       | 12.9           | 16.2        | 8.0                     | 15.9                   | 1.38    | 0.461 | 0.455                      |
| Flat590  | Flat        | N/A          | 590       | 8.9            | 10.7        | 8.7                     | 8.3                    | 3.82    | 0.442 | 0.425                      |
| Flat270  | Flat        | N/A          | 270       | 8.9            | 11.3        | 8.7                     | 7.7                    | 8.42    | 0.434 | 0.397                      |
| A**      | Hill        | crest        | 960       | 5.7            | 6.6         | 7.0                     | 6.6                    | 1.29    | 0.443 | 0.437                      |
| D**      | Flat        | N/A          | 960       | 9.0            | 10.8        | 8.9                     | 8.6                    | -0.36   | 0.447 | 0.448                      |
| Grp A, 1 | Hill        | 55.0 D       | 640       | 8.0            | 9.4         | 8.3                     | 12.6                   | 5.34    | 0.450 | 0.426                      |
| Grp A, 2 | Hill        | 58.8 D       | 640       | 8.0            | 9.4         | 8.0                     | 12.4                   | 7.46    | 0.445 | 0.412                      |
| Grp A, 3 | Hill        | 62.5 D       | 640       | 8.0            | 9.4         | 7.4                     | 13.1                   | 7.18    | 0.441 | 0.411                      |
| Grp A, 4 | Hill        | 73.8 D       | 640       | 8.0            | 9.4         | 6.1                     | 14.4                   | 0.19    | 0.460 | 0.458                      |
| Grp A, 5 | Hill        | 78.3 D       | 640       | 8.0            | 9.4         | 6.6                     | 13.2                   | -0.74   | 0.464 | 0.467                      |
| Grp A, 6 | Hill        | 82.8 D       | 640       | 8.0            | 9.4         | 7.2                     | 11.8                   | -0.02   | 0.461 | 0.461                      |
| Grp B, 1 | Hill        | 110.0 D      | 640       | 8.0            | 9.4         | 7.1                     | 10.9                   | 1.64    | 0.455 | 0.448                      |
| Grp B, 2 | Hill        | 117.5 D      | 640       | 8.0            | 9.4         | 7.6                     | 9.9                    | 2.01    | 0.454 | 0.445                      |
| Grp B, 3 | Hill        | 125.0 D      | 640       | 8.0            | 9.4         | 7.6                     | 9.7                    | 3.77    | 0.450 | 0.433                      |
| Grp B, 4 | Hill        | 147.5 D      | 640       | 8.0            | 9.4         | 7.6                     | 9.2                    | 2.00    | 0.453 | 0.444                      |
| Grp B, 5 | Hill        | 156.6 D      | 640       | 8.0            | 9.4         | 7.9                     | 8.6                    | 3.84    | 0.447 | 0.430                      |
| Grp B, 6 | Hill        | 165.6 D      | 640       | 8.0            | 9.4         | 7.4                     | 9.1                    | 3.76    | 0.445 | 0.429                      |

495 Table 1: Case descriptions and performance values from the 28 single-row wind farm analyses.  $U_m$  is the hub-height wind speed at the inflow boundary;  $W_g$  is the geostrophic wind speed; and  $C_{P,Wf}$  is the wind farm power coefficient.

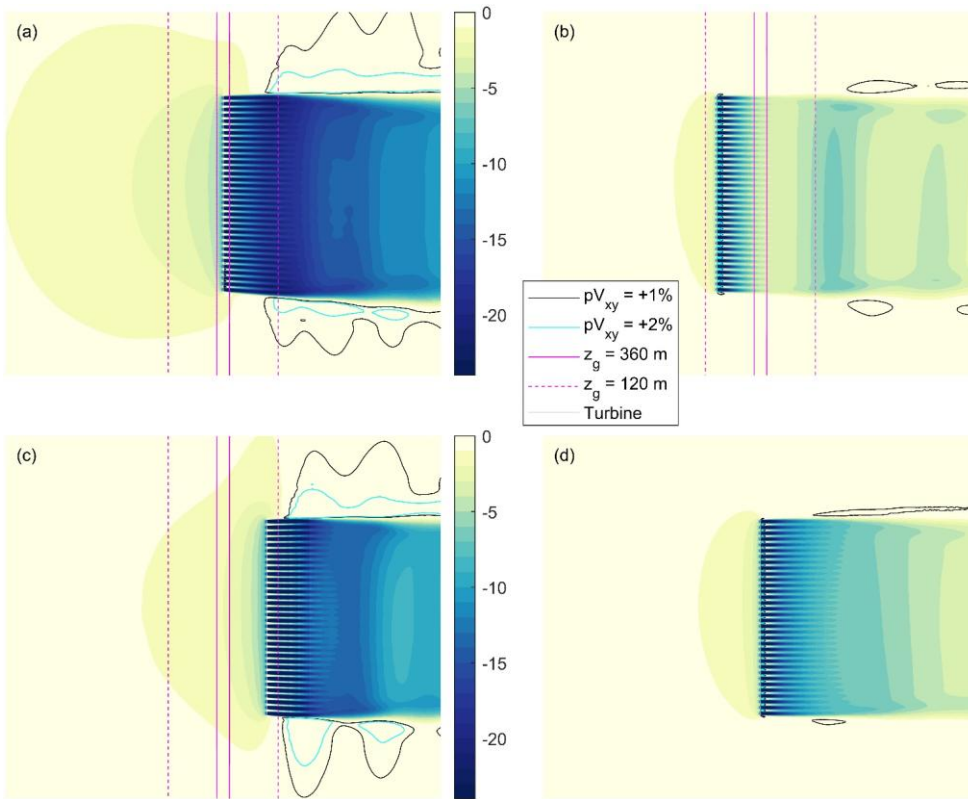

500 **Figure 8: Top view of the percent change in wind speed relative to freestream at hub height for Case A (a), Case B (b), Case C (c), and Case D (d) as defined in Table 1. Magenta lines are ground elevation contours; the hill crest is located between the two solid magenta lines.**

505 Figure 9 shows the percent change in wind speed relative to freestream for cases E-H; these cases are similar to cases A-D but with  $z_i = 640$  m. Compared with the  $z_i = 960$  m results in Fig. 8, the case-to-case trends in wake and blockage effects in Fig. 9 are similar but more pronounced—as are the case-to-case loss trends (compare cases E-H with cases A-D in Table 1). The effect of gravity waves is also more clearly evident in Fig. 9, especially for the case with the row on the leeward side of the hill (Case G). Fig. 10 shows the vertical component of velocity in a side view of the freestream solution for this case.

Hill-induced gravity waves can be seen in the figure. Despite the large amplitude of these waves, there is no indication of gravity waves reflecting off a boundary and polluting the results in this case or in any of the other cases in this study.

510

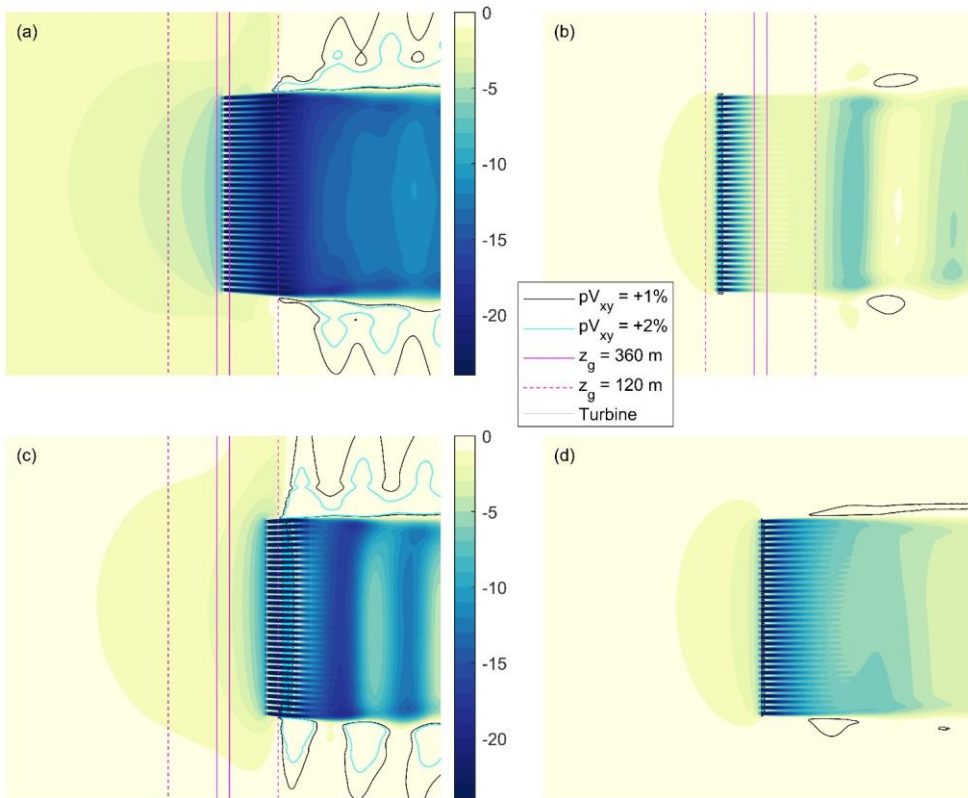

Figure 9: Top view of the percent change in wind speed relative to freestream at hub height for case E (a), case F (b), case G (c), and case H (d) as defined in Table 1. Magenta lines are ground elevation contours; the hill crest is located between the two solid magenta lines.

515

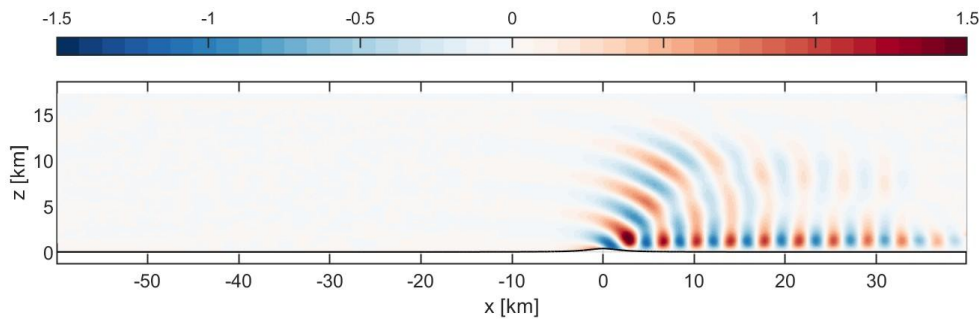

Figure 10: Case G, side view of the vertical component of freestream velocity [m/s] near the middle of the domain ( $y = 160$  m).

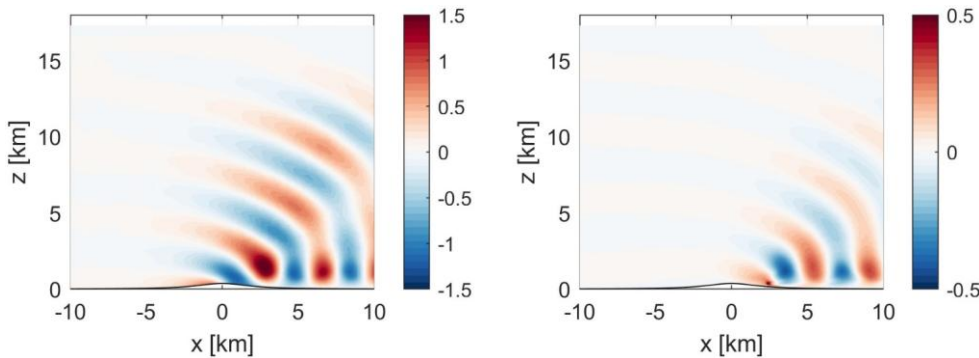

Figure 11: Case G, side view of the vertical component of velocity [m/s] near the middle of the domain ( $y = 160$  m): freestream solution (a); wind farm solution minus freestream (b).

520

The wind farm also induces gravity waves, a finding consistent with Allaerts and Meyers (2018). Figure 11a is a reproduction of Fig. 10 but zoomed in; Fig. 11b is from the same case but shows the wind farm solution minus the freestream solution, revealing the effect of the wind farm on the vertical component of velocity. The gravity waves induced by the wind farm have similar characteristics to the gravity waves induced by the hill, but with a lower amplitude and, because the wind farm is  $15 D$  downstream of the crest, a different initiation point and phase.

525

Differences in the upstream blockage effects evident in Fig. 8 and Fig. 9 are consistent with the differences in turbine interaction loss across the same eight cases in . The upstream blockage effects are, of course, the cause of turbine interaction loss in single-row wind farms. The rest of this subsection focuses on *how* terrain modulates these upstream effects.

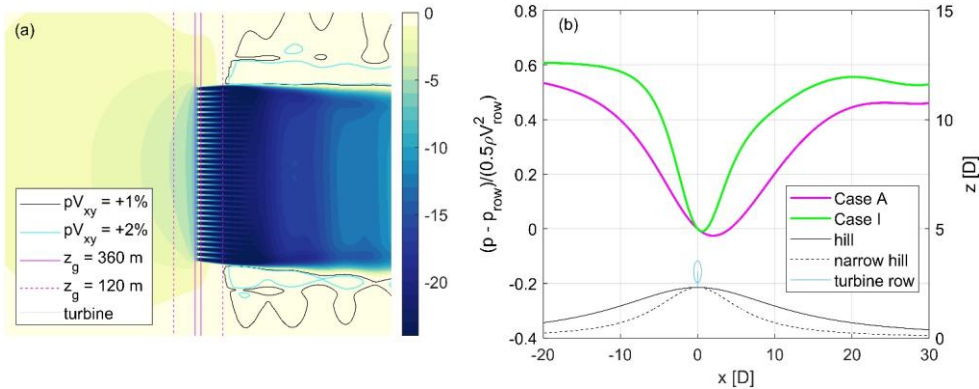

530

**Figure 12: Top view of the percent change in wind speed relative to freestream at hub height for Case I (a), and freestream pressure coefficient along the hill profiles at hub height at  $y = 0$  m (b). Case I (narrow hill) is in green. Case A (hill) is magenta. The pressure coefficient is relative to conditions at the hill crest, where the wind turbines in the corresponding wind farm simulations are located. The thin black lines depict the two hill profiles.**

535

We begin this effort with an analysis featuring a hill that is narrower than the baseline hill. Case I is similar to Case A ( $z_i = 960$  m with the turbines on the hill crest), but it has a hill profile that is half as wide. Figure 12a shows the percent change in wind speed relative to freestream for Case I, and Fig. 12b shows the streamwise freestream pressure variation for both the narrow hill case (Case I) and the similar baseline hill case (Case A). Compared with the baseline hill, there is a sharper pressure rise downstream of the crest of the narrow hill case. This deepens and expands the wake downstream, increasing the wake blockage, which appears to contribute to an increase in the upstream blockage effect and, in turn, a larger loss for the narrow hill case.

540

545

The concept of wake blockage is well known among those who conduct wind tunnel experiments, but it is seldom discussed in the wind energy community. Blockage is an obstruction causing oncoming flow to diverge from the path it would otherwise take. The obstruction need not be solid – a local region of relatively slow-moving flow can have a similar effect. In this discussion, the slow-moving flow feature is the wind farm wake. According to the continuity equation, the presence of the wind farm wake means that flow must diverge and slow upstream. Because hill-induced streamwise pressure gradients affect the wind speed in the wake and the size of the wake, it also affects how much oncoming flow is deflected relative to freestream conditions. This deflection cannot happen discontinuously. It happens over a distance, a distance that could include locations upstream of the wind farm. In other words, according to this theory, wake blockage, which can be modified by streamwise pressure gradients, influences the blockage-related slowdown upstream of the wind farm. These slowdowns in turn affect the wind speeds experienced by the turbines and the turbine interaction loss. A similar theory was put forward in Revaz and Porté-Agel (2024) to explain the effect of streamwise pressure gradients on the induction of an individual turbine;

550

however, to our knowledge, the theory has not, until now, been applied to wind farm blockage in terrain. This theory is not a complete explanation: there are likely other terrain-induced influences on upstream blockage effects. Nevertheless, it does appear to explain some of the terrain-related blockage trends in the single-row results.

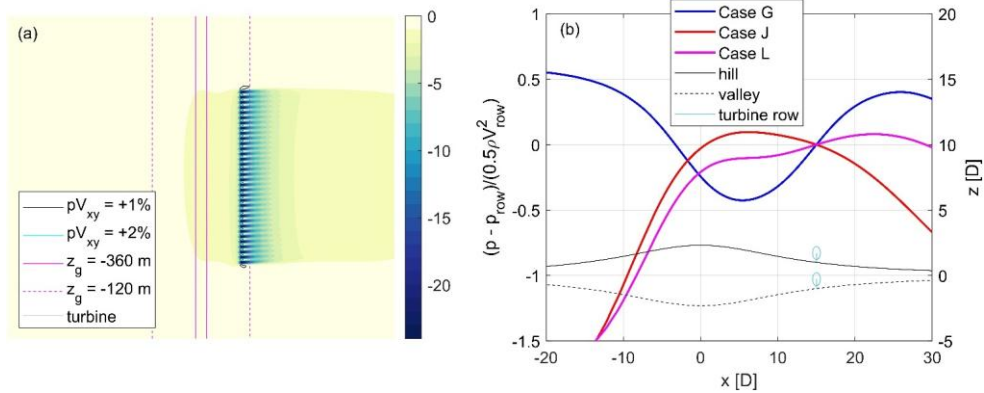

Figure 13: Top view of the percent change in wind speed relative to freestream at hub height for Case J (a), and freestream pressure coefficient along the terrain profiles at hub height at  $y = 0$  m (b). The Case J (valley) pressure coefficient is in red; Case G (hill) is in blue; and Case L (valley) is magenta. The pressure coefficient is relative to conditions  $15 D$  downstream of the hill crest and valley trough, the location of the turbine rows in the corresponding wind farm simulations. The thin black lines depict the valley and hill profiles.

We also analyzed two valley cases, Case J and Case L. The valley is a mirror image of the baseline hill and the row is on the leeward side of the valley,  $15 D$  downstream of the minimum elevation of  $-370$  m. The altitude where the inversion starts,  $z_i$ , is  $640$  m. The main difference between the two cases is the prescribed geostrophic wind speed, which is  $13.4$  m/s for Case J and  $16.2$  m/s for Case L. Figure 13a shows the percent change in wind speed relative to freestream for Case J, and Fig. 13b shows the streamwise variation of freestream pressure at hub height along the terrain profiles for the two valley cases as well as for the hill case with the same  $z_i$  and turbine row location (Case G). The background streamwise pressure gradient near the turbine locations in Case J is clearly favorable, in sharp contrast to the hill case. This contributes to a huge difference in the wind farm wake (compare Fig. 13a with Fig. 9c). Again, we believe this difference in the wakes feeds back and contributes to significant differences in the effect of blockage upstream. Again, this simple narrative is incomplete. In this instance, for example, other contributors to the differences in the wind farm wakes between the two cases include large differences in background turbulence levels as well as differences in blockage itself. Fully isolating causes and effects in such a fluid dynamic system is often not straightforward. Nevertheless, we can definitively state that the difference in blockage-related upstream slowdowns causes the large difference in the turbine interaction loss between the two cases:  $15.6\%$  for the hill case and  $-1.8\%$  for this valley case, a turbine interaction gain. The faster flow in Case L responds differently to the terrain compared with Case J, resulting in a mild adverse pressure gradient in the background flow near the turbines (Fig. 13b) and a

Deleted: results in

Deleted: wake recovery

Deleted: T

Deleted: s

higher turbine interaction loss (+1.4% vs. -1.8%). The difference in freestream streamwise pressure gradients across the three cases also contributes to differences in the turbine efficiency ( $C_p$ ) as discussed in Section 3.3.

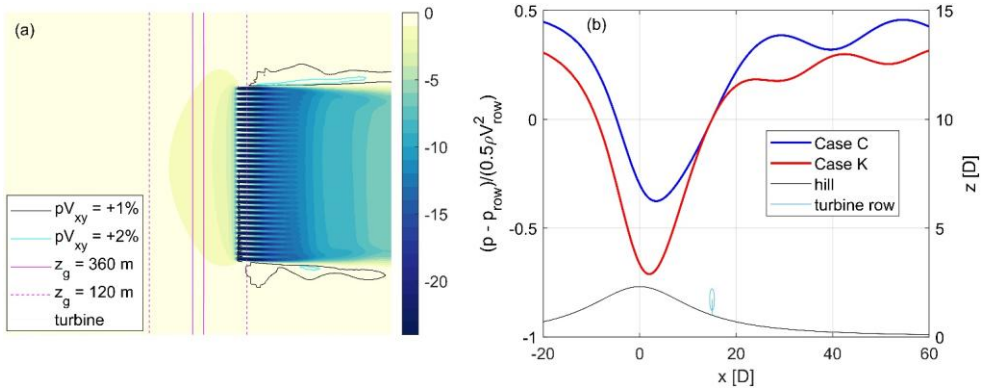

585

**Figure 14: Top view of the percent change in wind speed relative to freestream at hub height for Case K (a), and freestream pressure coefficient along the hill profiles at hub height at  $y = 0$  m (b). Case K is in red, Case C is in blue. The pressure coefficient is relative to conditions 15 D downstream of the hill crest, the location of the turbine rows in the corresponding wind farm simulations. The thin black line corresponds to the hill profile.**

590

The effect of inflow wind speed on turbine interaction loss is also evident in the hill simulations. Case K is similar to Case C but runs with a lower geostrophic wind speed of 6.6 m/s compared with 8.0 m/s in Case C. This difference in wind speed results in a very different predicted loss (see ). Figure 14a shows percent change in wind speed relative to freestream for Case K, and Fig. 14b shows the streamwise variation of freestream pressure along the hill for Case K and Case C. The phase and wavelength of the freestream gravity waves in the lee of the hill are clearly different between these two cases, with the lower wind speed case exhibiting hill-induced gravity waves with **shorter** wavelengths. The differences in the gravity waves contribute to differences in the streamwise variation of pressure in the lee of the hill. The streamwise pressure gradient at the turbine row is about the same between the two cases, but there is a greater pressure rise further downstream in Case C. This will contribute to a deeper wake. The fact that the wind farm wake in Case K is not as deep or thick compared to Case C may contribute to differences in the upstream blockage effect. In this way, hill-induced gravity waves indirectly contribute to upstream slowdowns. Gravity waves, and more generally the response of stratified flow to the hill and the turbines, may also affect these slowdowns more directly – as will be discussed later in this section.

595

Deleted: longer

600

605

We ran additional simulations in order to further explore the various influences on turbine interaction loss in single-row wind farms. Twelve of the additional single-row analyses were run using the Case F inflow conditions and terrain. Gravity waves in this case induce significant streamwise pressure variations, even on the relatively flat terrain downstream of the hill. This

Deleted: not listed in Table 1

can be seen in Fig. 15, which also shows the locations of the 12 additional single-row wind farms. The Group A wind farms correspond to locations where there are large local variations in the background pressure. The Group B wind farms are further downstream and generally correspond to locations where the local variations in pressure are smaller.

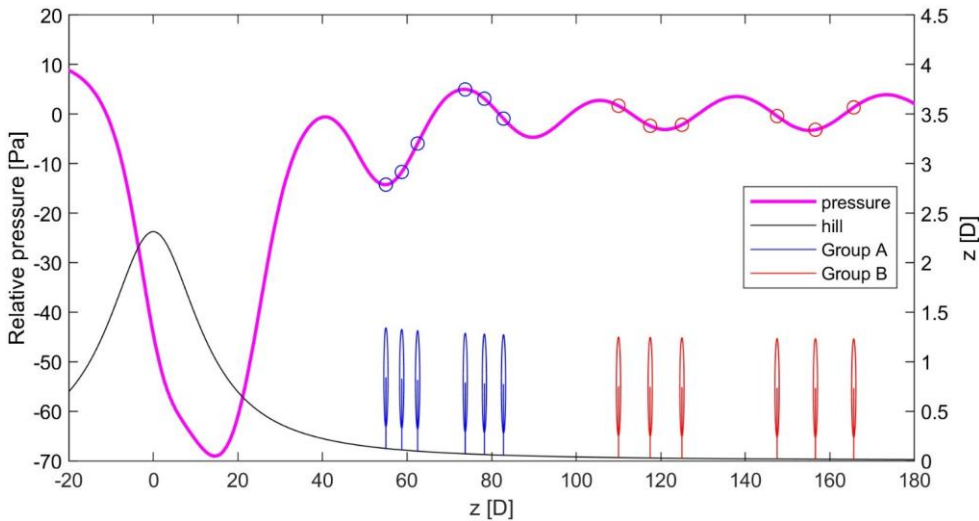

Figure 15: Freestream pressure variation for Case F. The locations of the six single-row wind farms in Group A (blue) and the six single-row wind farms in Group B (red) are shown relative to the location of the hill profile (black).

Also, two additional analyses were run on flat terrain, each with a lower inversion height ( $z_i = 590$  m and  $z_i = 270$  m). Finally, Case A and Case D were rerun with the buoyancy term in the vertical momentum equation zeroed out.

Plotting array efficiency vs freestream pressure coefficient for all these cases provides insight into the physical influences on blockage-related upstream slowdowns. Pressure coefficient in Fig. 16 is equal to the pressure difference between the turbine row location and 8 D downstream, normalized by the dynamic pressure at the row location—with all values coming from the freestream simulation. There is a correlation between freestream pressure coefficient and array efficiency in Fig. 16. The correlation coefficient is -0.74, which translates to an  $r^2$  of 0.54 for a linear regression of the data ( $r^2$  is 0.61 when the two results without buoyancy are removed). The correlation does not materially improve when using different locations to calculate the pressure coefficient.

625

The trend across the flat-terrain cases (black symbols) is different from the overall trend in that there is significant variation in loss across the flat cases despite hardly any variation in the freestream pressure coefficient. As the inversion gets lower in the flat cases, the slowdown upstream of the single row becomes more pronounced and the array efficiency decreases, a trend consistent with the results reported in Blegg and Montavon (2022). This finding suggests that there may be more influencing upstream slowdowns in single-row wind farms than just streamwise pressure variation in the background flow and its impact on wakes.

630

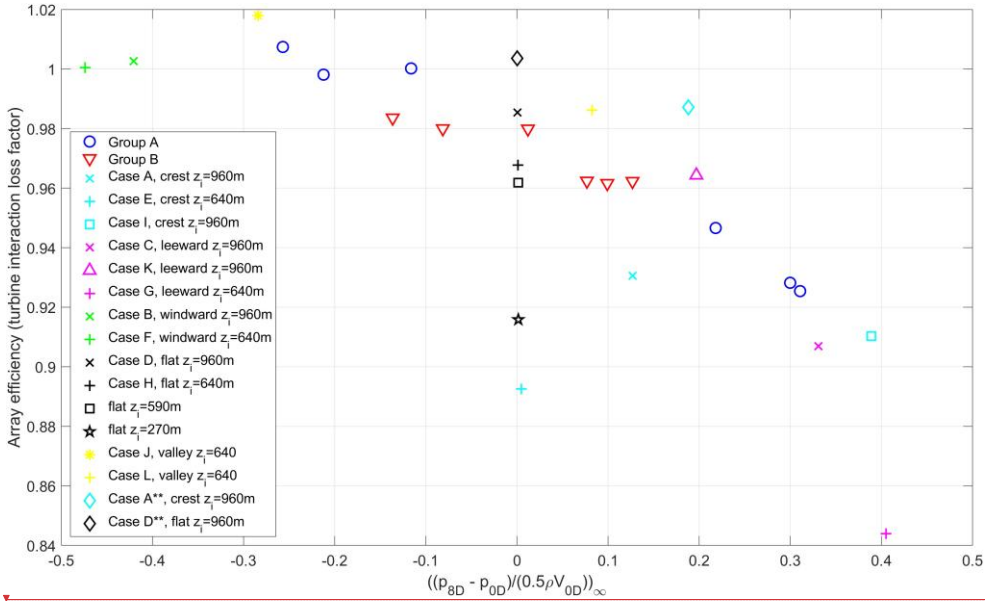

Figure 16: Array efficiency vs. freestream pressure coefficient for all single-row cases. The pressures are extracted from the freestream simulation at the turbine row location and 8 D downstream at hub height at  $y = 0$  m. Cases without buoyancy are marked with two asterisks in the legend.

635

The trend across the flat cases may partially explain the trend across the crest cases (light blue), which also deviates from the overall trend. For example, in Case E, where the row is on the crest and  $z_i$  is 640 m, the freestream pressure drop between the row location and 8 D downstream is negligible, yet the upstream blockage effect is very strong (Fig. 9a), and the array efficiency is lower than the efficiencies in all but one of the other cases. Note that in this case the height of the inversion above the ground at the hill crest is comparable to the height of the inversion in the flat case with  $z_i = 270$  m. The physical processes that contribute to the large upstream blockage effects in the flat case with  $z_i = 270$  m may also contribute to the large blockage effects in Case E. These processes probably influence the blockage effects in the other cases too.

640

Deleted: ¶

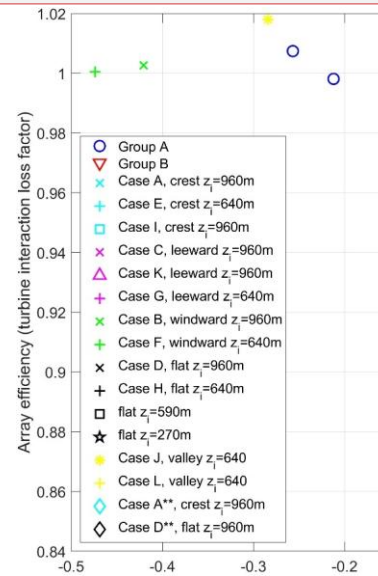

Deleted:

645

These physical processes likely relate to the response of stratified flow to an obstacle, which in this study is a row of turbines. A non-dimensional number relevant to upstream blockage effects is the local Froude number, which we define as follows:

$$F = \frac{\bar{u}_{BL}}{\sqrt{g' h_{inv}}} \quad (4)$$

650

$h_{inv}$  is the vertical distance between the ground and the altitude where the vertical gradient of the potential temperature is at a maximum.  $\bar{u}_{BL}$  is the average of the x-component of velocity below  $h_{inv}$ . Finally,  $g'$  is the reduced gravity defined as  $g' = g \Delta\theta / \theta_0$ , where  $g$  is the acceleration due to gravity ( $9.81 \text{ m/s}^2$ ),  $\Delta\theta$  is the change in potential temperature across the inversion (5 K), and  $\theta_0$  is the reference potential temperature (286 K). The inputs to Equation 4 come from the freestream simulations.

655

The Froude number as defined above represents the ratio of the local wind speed to the wave speed along the inversion. As the freestream local Froude number increases and approaches 1.0 in these simulations, the upstream effect of a turbine row introduced to the flow generally increases, causing the efficiency of the row to decrease. This can be seen in Fig. 17, which shows array efficiency vs. local Froude number for all the cases except for the two cases with buoyancy zeroed out of the vertical momentum equation. There is a strong correlation between Froude number and single-row efficiency for the flat cases (black symbols). Across the other cases a correlation is still present, but it is not as strong. The correlation coefficient,  $r$ , across all cases is -0.68. A multi-variable linear regression of the wind farm efficiency data with local Froude number and pressure coefficient as independent variables yields an  $r^2$  value of 0.76, which is significantly higher than the  $r^2$  values from separate single-variable linear regressions of the efficiency data ( $r^2$  is 0.47 when using local Froude number and 0.61 when using pressure coefficient). The efficiency trends may correlate better with different or additional independent variables. For example, vertical shear likely influences  $\eta$  as it did in Bleege and Montavon (2022). Turbulence might also affect blockage and  $\eta$  via its influence on wake recovery: the correlation coefficient between freestream turbulence intensity and  $\eta$  for these cases is +0.58, with  $r^2 = 0.33$  (if the two zero-buoyancy cases are included, the correlation coefficient is +0.51, with  $r^2 = 0.26$ ). In any case, the inviscid response of the stratified flow to terrain and the turbine row appears to have a significant influence on the upstream blockage effect in these simulations. Underlining this point, if we turn off the buoyancy in the vertical momentum equation, (diamond symbols in Fig. 16), the upstream blockage effect decreases and the row efficiency increases, especially for Case A, where the row is on the hill crest. That said, even with the buoyancy turned off, blockage effects and array efficiency are still sensitive to terrain (the  $\eta$  difference between the two cases is 1.65%). So while buoyancy is a primary contributor to the effect of terrain on blockage in this study, it clearly is not the only contributor.

675

Deleted: in cases A and D

Deleted: 92

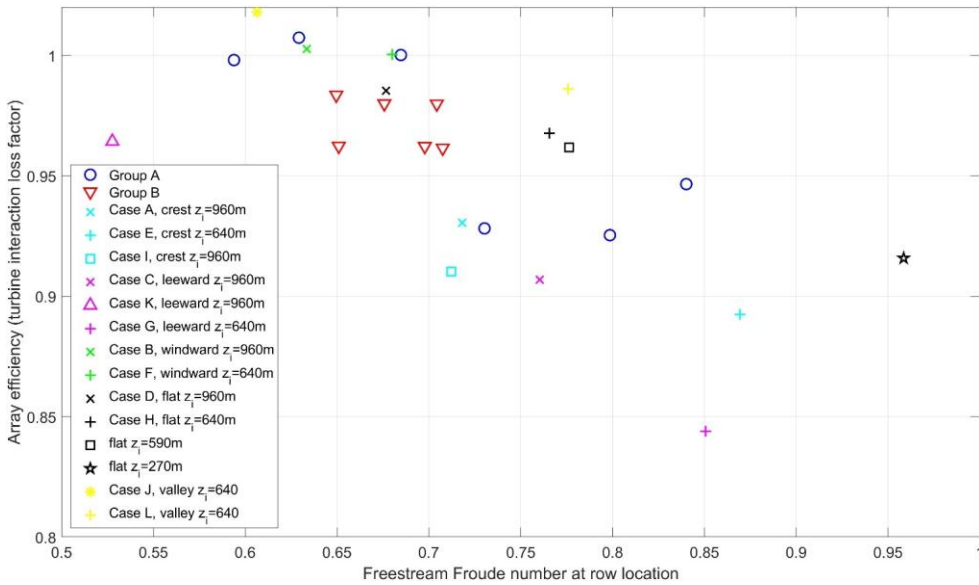

680 **Figure 17: Array efficiency vs. local freestream Froude number for all single-row cases with buoyancy in the momentum equation.**

### 3.3 Turbine performance

Not only can terrain influence wind farm efficiency, it can also affect turbine efficiency. The nominal  $C_p$  level for the simulated turbine is 0.445 when the hub-height freestream wind speed is between 6.1 m/s and 9.6 m/s (Fig. 2). Even though the simulated turbines in this study operate within this wind speed range, the  $C_p$  values derived from the results using Eq. (3) can depart significantly from 0.445. In , the  $C_p$  values vary between 0.408 and 0.477.

Turbine power is traditionally seen as a function of freestream conditions, but in fact it is more directly a function of the wind conditions at the rotor face during turbine operation. It is the conditions at the rotor face that determine the loads on the blades and in turn the rotor thrust and torque. The actuator disks in this study behave similarly: thrust and torque are functions of wind conditions at the disk when the actuator disk is on. The power coefficient,  $C_p$ , is the ratio between the power of a solitary turbine and the flux of kinetic energy passing through the rotor area when the turbine is not there.  $C_p$  varies substantially across the different cases in this study, implying that terrain can change the relationship between the freestream conditions and the conditions at the rotor disk. More specifically, it can affect induction factor. If terrain leads to an increase in the induction factor, the wind speed at the turbine rotor face decreases, decreasing power relative to the freestream kinetic energy flux. In other words, for a given turbine model an increase in induction factor reduces  $C_p$ .

Formatted: Font: Not Italic

Variations in induction factor and power coefficient are perhaps more commonly associated with wind turbine design changes. Here, rather, we claim that for a given turbine design, external factors, such as terrain-induced streamwise pressure variations, can affect induction factor and thereby  $C_p$ . Figure 18 plots  $C_p$  against freestream pressure coefficient for the cases in this study. This time the pressure coefficient is between the turbine row locations and locations 3 D downstream (instead of 8 D). There is a correlation between  $C_p$  and the freestream pressure coefficient ( $r = -0.78$ ), suggesting that streamwise variation in the background freestream pressure across the near wake may influence  $C_p$ . We believe the mechanism is similar to that described in the previous section and in Revaz and Porté-Agel (2024): streamwise variations in the background pressure affects the depth and size of the near wake and in turn the amount by which oncoming flow deflects relative to freestream conditions. The amount by which the oncoming flow deflects directly connects with induction and thereby  $C_p$ . As discussed in the Introduction, many other researchers have identified a connection between streamwise variation in the background (freestream) flow and turbine efficiency, using both simulations (Troldborg et al., 2022; Zengler et al., 2024; Revaz and Porté-Agel, 2024) and wind tunnel experiments (Dar et al., 2023).

Deleted: 7

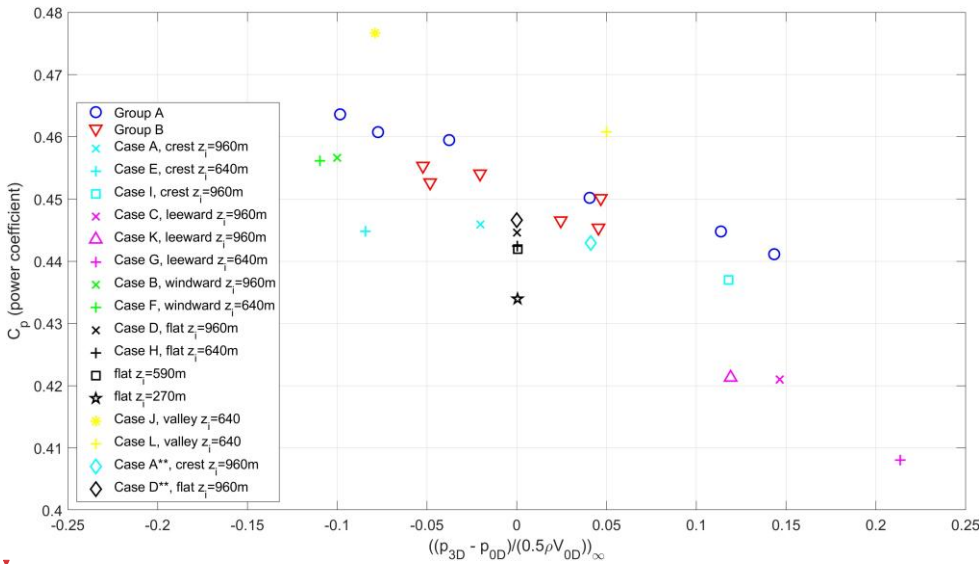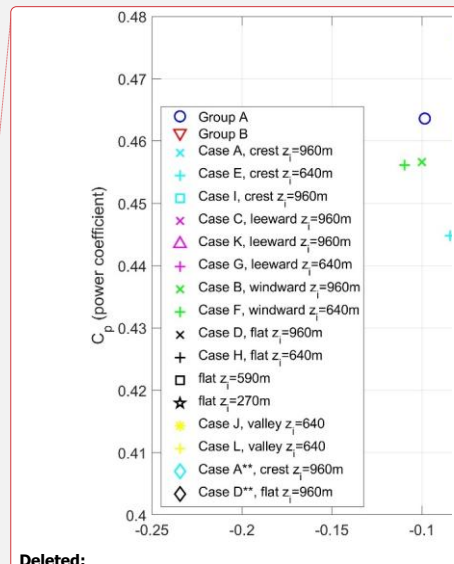

Deleted:

Figure 18: Individual turbine efficiency ( $C_p$ ) vs. freestream pressure coefficient. The pressures are extracted from the freestream simulation at the turbine location and 3 D downstream at hub height at  $y = 0$  m. Power is extracted from isolated turbine simulations. Cases without buoyancy are marked with two asterisks in the legend.

The factors influencing  $C_p$  in this study do not appear to be limited to terrain-induced streamwise pressure variations. Within narrow bands of freestream pressure coefficient there are significant differences in  $C_p$  in Fig. 18. Across the flat cases, where pressure coefficient deviates little from zero, turbine efficiency decreases as  $z_1$  decreases, though not as dramatically as the wind farm efficiency in Fig. 16. ~~It is possible that stratification above the boundary layer affects turbine blockage and contributes to the  $C_p$  trend in the flat cases and other cases. But there are likely other contributors: Dar et al. (2023) and Revaz and Porté-Agel (2024) also show clear but imperfect correlations between  $C_p$  and streamwise pressure variation, but in these studies, the other contributors to  $C_p$  variation cannot be related to stable stratification, as the flows are purely neutral, with no buoyancy.~~

Deleted: S

Deleted: appears, then, to

Deleted: probably

Deleted: as well

Deleted: T

Deleted: additional

### 3.4 A real wind farm

The results presented so far have been from simulations of notional wind farms in conventionally neutral boundary layers on idealized terrain. The results in this subsection are from simulations of a real wind farm with inflow atmospheric conditions derived from the output of a mesoscale model. The subject wind farm has 94 modern wind turbines organized in rows atop ridgelines as depicted in the elevation map in Fig. 19. The spacing between turbines is tight with hub-to-hub distances as low as 1.5 D. The north, south, east, and west domain boundaries are at least 16 km from the turbines, and the top boundary is 17 km above the maximum ground elevation in the simulation.

Results from the Weather Research and Forecasting model (WRF) run with the MYJ boundary layer scheme over a full year were used to inform the RANS inflow boundary conditions. We started with a time series of vertical profiles extracted from the WRF output at a location approximately coincident with the east boundary of the RANS model. We then filtered the time series of profiles for eastern flows and divided the remaining records into two batches, one corresponding to unstable surface conditions and the other corresponding to stable surface conditions. For each batch of records, we derived a single set of profiles (potential temperature, velocity, and turbulence quantities) intended to represent the average conditions in the batch. The inflow potential temperature profiles for the RANS simulations are shown in Fig. 19b and Fig. 19c. The profiles in Fig. 19b were used in the simulations of the wind farm on real terrain. The profiles in Fig. 19c were used in the simulations of the wind farm layout on flat terrain. The inflow wind speed levels were set such that the turbines across all the cases experience similar wind speeds. This can be done while maintaining the same potential temperature profiles for the flat and real terrain cases when the simulated boundary layer is unstable; however, in our approach to simulating stable boundary layers (Bleeg et al., 2015a), the differences in the inflow wind speeds between the flat and real terrain cases necessitate somewhat different potential temperature profiles.

The unstable potential temperature profile does not include a superadiabatic lapse rate in the surface layer. We do this to avoid the occurrence of thermal convections in the solution, as convective structures resolved by a RANS model would likely be spurious. We instead simulate the unstable boundary layer as a conventionally neutral boundary layer but with

755 additional turbulence source terms designed to represent the impact of convections on turbulence, and in turn the mean flow. The source terms are based on similarity theory (Vulfson and Nikolaev, 2022) with the main inputs being ground heat flux and the height of the boundary layer ( $158 \text{ W/m}^2$  and  $1000 \text{ m}$  in this case). Blegg et al. (2023) has more information on this approach to simulating unstable boundary layers in RANS.

760 The average freestream hub-height wind speed across the turbines in all these simulations is approximately  $8 \text{ m/s}$ . The average wind direction is  $80^\circ$ . Figure 20 depicts the results from these simulations.

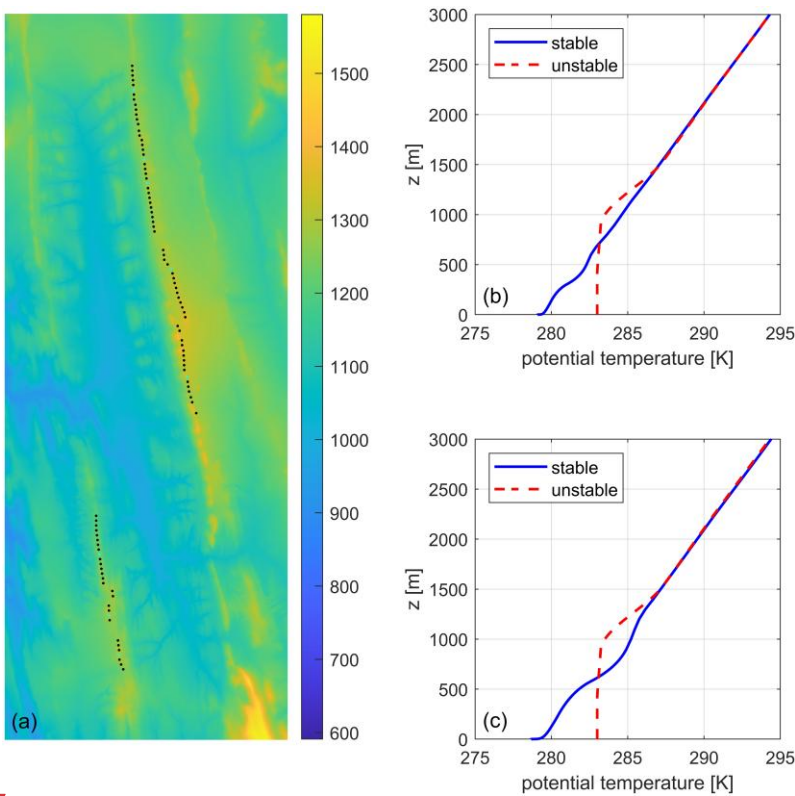

765 **Figure 19: Elevation map and turbine layout (a); inflow potential temperature profiles for the real terrain simulations (b); and inflow potential temperature profiles for the flat terrain simulations (c). Light blue dots on the map represent turbines that were also simulated in isolation in both unstable and stable conditions.**

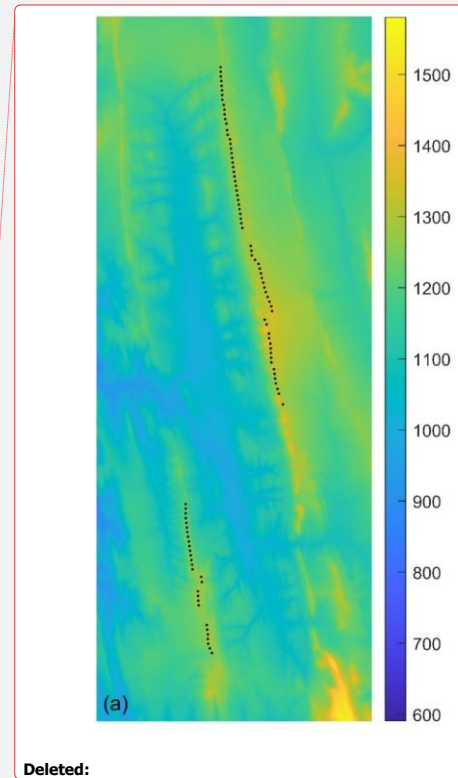

Deleted:

In the real terrain results (Fig. 20a and Fig. 20c) the wakes downstream of the wind farm are generally deeper at hub height than the wakes in the flat terrain results (Fig. 20b and Fig. 20d). The blockage-related upstream slowdowns in real terrain are also more pronounced, with the slowdowns greater in the simulations of the stable boundary layer than the unstable boundary layer for both real and flat terrain. The loss trends between the cases reflect the difference in upstream blockage effects. In both unstable and stable conditions, the turbine interaction loss is about 4% greater in real terrain than in flat terrain for the simulated conditions. In unstable conditions the predicted loss is 5.3% in real terrain and 0.9% in flat terrain. In stable conditions the loss is 16.5% in real terrain and 12.4% in flat terrain. Note that the loss predictions in this paper correspond to the simulated conditions only; if the turbine interaction analysis considered the full range of atmospheric conditions at this wind farm, particularly the wind speed distribution, the predicted blockage-related losses would be much lower.

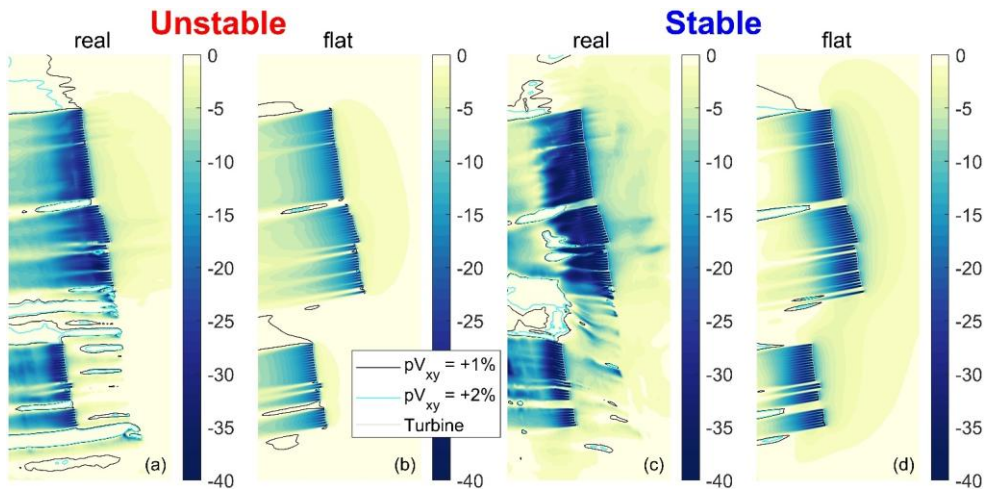

Figure 20: Top view of the percent change in wind speed relative to freestream at hub height for the simulation of the unstable boundary layer in real terrain (a); the unstable boundary layer in flat terrain (b); the stable boundary layer in real terrain (c); and the stable boundary layer in flat terrain (d).

It is somewhat less straightforward to assess the effect of terrain on turbine efficiency in this case compared with the idealized cases. This is due to the variability of the terrain in combination with the fact that, unlike the  $C_p$  curve in Fig. 2, the  $C_p$  curve of a real wind turbine is not constant over a wide range of wind speeds. That said, the maximum variation along nominal  $C_p$  curve between 7 m/s and 9 m/s is just 1%. In the following discussion, this operating range is labeled the “nearly flat” part of the nominal  $C_p$  curve (again, the nominal  $C_p$  curve informs the  $U_{disk}$ -based turbine performance look-up tables used in the simulations). We simulated 8 of the 94 turbines in isolation; these turbines, which are spread across the wind

Deleted: complexity

Formatted: Font: Not Italic

Deleted:  $C_p$

farm, are highlighted with light blue dots in Fig. 19a. When simulated on the real terrain, whether in the stable or unstable conditions, 6 of the 8 solitary turbines end up on the nearly flat part of the nominal  $C_p$  curve. In stable conditions, the two northernmost isolated turbines are outside the nearly flat range, and in unstable conditions, the northernmost isolated turbine in each of the two rows is outside this range. When simulated on flat terrain, all the isolated turbines operate on the nearly flat part of the nominal  $C_p$  curve. If we calculate  $C_p$  from the isolated and freestream simulations using Eq. (3) and limit the calculation to turbines operating on the nearly flat part of the nominal  $C_p$  curve, the average  $C_p$  for the turbines simulated in real terrain is more than 4% lower than the average  $C_p$  of the turbines simulated on flat ground – specifically, 4.4% lower in unstable conditions and 4.5% lower in stable conditions. As with wind farm efficiency, the average effect of terrain on turbine efficiency will be much lower when aggregated over the full range of wind speeds.

Formatted: Font: Not Italic

Formatted: Font: Not Italic

Formatted: Font: Not Italic

**Deleted:** Nevertheless, we were able to assess the predicted impact of terrain on  $C_p$  for a few of the turbines at this wind farm—two turbines during unstable conditions and four turbines during stable conditions. When the simulated boundary layer was unstable, terrain reduced the average  $C_p$  of the two turbines by 4.4%. When the simulated boundary layer was stable, terrain reduced the average  $C_p$  of the four turbines by 4.8%. We have not assessed the impact of terrain on  $C_p$  for the other 90+ wind turbines or for other wind directions. Also, ...a

In this subsection simulations of a real wind farm with characteristics similar to the idealized wind farms in Section 3.2 – but using site-specific inflow conditions instead of conventionally neutral boundary layers – yield results consistent with the findings derived from the idealized wind farms with respect to the effect of terrain on wakes, blockage, and efficiency. It is not known from these results the extent to which the findings apply to onshore wind farms in general. To understand this better, future work could involve simulating other types of terrain and wind farm layouts.

## 4 Discussion

Terrain influences wake and blockage effects at wind-farm-scale and at turbine-scale according to the RANS results presented in Section 3. In this section we discuss the practical implications of these findings, as well as how much weight one should place on the findings given limitations in the modeling and the scope of the investigation. We also discuss the types of field observations that could improve our understanding of the effect of terrain on wakes and blockage.

### 4.1 Practical implications

The influence of terrain on wakes and blockage may have significant implications for wind farm energy yield. According to the results of this RANS-based study, terrain can influence not only array efficiency ( $\eta$ ), but also turbine efficiency ( $C_p$ ). Further, there might be a correlation between the effect of terrain on  $\eta$  and the effect of terrain on  $C_p$ . In the single-row wind farms in this study, the correlation coefficient between  $\eta$  and  $C_p$  is 0.81 (ignoring the two cases without buoyancy).

Deleted: 79

Take for example Case C, a single row on the leeward side of the hill with  $z_1 = 960$  m. In this case, the turbines collectively produce 9.31% less power than they would if each one were simulated in isolation. By comparison, the turbine interaction loss,  $L$ , in the corresponding flat terrain analysis, Case D, is 1.46%. Thus, the wind farm turbines in Case C are 7.85% less efficient relative to isolated operation than the turbines in Case D. On top of that, the isolated turbines in Case C are also less

efficient, with a  $C_p$  of 0.421 compared to 0.444 in Case D, a difference of 5.81%. As a result, the overall energy conversion efficiency of the wind farm,  $C_{p,WFA}$ , is 12.8% less in Case C (0.382) than in Case D (0.438).

Current industry practices for estimating the energy yield of a planned wind farm largely neglect the effect of terrain on wakes and blockage, as well as the related effect terrain has on wind farm efficiency and individual turbine efficiency. This could lead to material prediction errors, which would contribute to uncertainty in energy yield predictions. These errors may also result in wind farms that are less productive than they otherwise would be if terrain effects were more fully accounted for during the design of the wind farm.

Mitigating this risk requires flow modeling that captures the key fluid dynamic elements contributing to the influence of terrain on wakes and blockage. Most commonly used engineering models are able to partially account for terrain-induced turbulence and its impact on wakes; however, at present these models are not able to simulate terrain-induced inviscid effects, which can substantially affect turbine interaction loss. Terrain-induced streamwise pressure gradients can have a large impact on wake development, which in turn influences upstream blockage effects. The inviscid response of stratified flow to the terrain and wind farm further modifies blockage effects. Completing the interlinkage, blockage effects influence wake development (Lanzilao and Meyers, 2024; Ndayino et al., 2025). In other words, terrain affects wakes, which affect blockage; terrain also directly influences blockage, which affects wakes. It is a tightly coupled fluid dynamic system, and the approach used to model it should aim to reflect this overarching aspect of the flow.

#### 4.2 Limitations

How seriously one should take these conclusions depends in no small part on the reliability and the representativeness of the simulations behind them. With respect to real-world representativeness, the effect of terrain on wakes and blockage may be generally larger in idealized quasi-2D terrain than in real terrain. The effect may also be larger, or at least different, for wind farms organized in rows with tight spacing as compared to other types of turbine layouts. The simulated atmospheric conditions also raise questions of representativeness: the effect of terrain on stratified flow is very sensitive to the simulated atmospheric conditions, particularly the potential temperature profile; if the atmospheric conditions simulated in an analysis of a particular wind farm are not representative of the actual site conditions, it could result in substantial errors in the prediction of the impact of terrain on wake and blockage effects.

With respect to reliability of the simulations, the RANS model used in this study has shown good agreement with field observations related to blockage and wakes at many wind farms, including three with elevation variation on the order of what is simulated in this study (these three are internal validations not reported in the references provided in Section 2.1).

That said, there are reasons to question the near-wake predictions. Simulations with actuator disks cannot capture some of the important flow features in a near wake, like hub and tip vortices, and internal validation indicates that the near wakes

Deleted: Specifically,

Deleted: t

simulated with this RANS model generally diffuse too rapidly relative to field observations. The effect of terrain-induced streamwise pressure gradients on the near wake of an individual turbine is proposed to be central to the impact of terrain on turbine efficiency. Given these facts, there is enhanced risk that the predicted turbine efficiency trends are inconsistent with what would occur in the field. That said, several other recent studies cited herein, including a wind tunnel experiment, have yielded similar trends.

#### 4.3 Field observations wanted

Relevant field observations could improve our understanding of the impact of terrain on wakes and blockage as well as our understanding of the reliability of related flow modeling. Wind speed measurements taken just upstream of a wind farm for sufficiently long periods before and after the wind farm starts operating could help in assessing the effect of terrain on wind farm blockage. As described in Bleeg et al. (2018), an analysis of the data can reveal the degree to which the wind speed upstream of the wind farm changes relative to a reference wind speed time series due to the presence of the wind farm. Separately, turbine power data from a wind farm located in terrain where there are marked streamwise variation in the background wind speed could help in the assessment of the effect of terrain on wakes.

However, it is difficult to isolate the impact of terrain on field observations related to blockage and wakes. Unlike in a wind tunnel or a simulation, it is not reasonably possible in the field to obtain back-to-back measurements of a similar wind farm in flat terrain. A way forward could be to compare the measurements with simulations of the wind farm layout on the real terrain and on flat terrain. The comparison could provide insight into both the reliability of the simulations and the degree to which terrain is affecting blockage and wake effects at the subject wind farm.

As for the effect of terrain on turbine efficiency, a type of measurement commonly used in the wind industry may be relevant. The theory promoted here, and elsewhere, is that terrain can affect induction and in turn  $C_p$ . This terrain effect, if real, is likely reflected in standard turbine power performance measurements (PPM), which involve concurrent measurements of turbine power and upstream wind speed. The IEC standard for turbine PPM, IEC 61400-12 (2022), requires that the wind speed measurement take place 2 to 4 rotor diameters upstream of the test turbine, where the effect of turbine induction is small (Medici et al., 2011). Thus, any impact of terrain on induction should have less of an impact on the measured wind speed than on the wind speed at the rotor face. Therefore, if terrain has an impact on  $C_p$ , it should be at least partly captured in the PPM. That said, even if the effect of terrain is captured in the measurements, it will not be straightforward to isolate the effect. An assessment of many measured  $C_p$  curves from a single turbine model across a variety of topographies may help – especially if done in conjunction with simulations with and without the real terrain. Still, there are many confounding factors that can directly influence turbine power performance—including flow inclination, shear, and turbulence, all of which are sensitive to terrain—and it may be difficult to truly isolate from the measurements the effect of terrain on induction and in turn turbine efficiency.

Deleted: measured

Deleted: for example,

Deleted: and

Deleted: both

## 5 Conclusions

We simulated 35 different combinations of wind farm layout, terrain, and inflow atmospheric conditions using RANS. The wind farms were organized in one or two rows of closely spaced turbines. The terrain in nearly all cases was idealized, either quasi-2D or flat, and the inflow boundary layers in these cases were neutral with overlying thermal stratification. The few remaining cases correspond to a real wind farm with characteristics similar to some of the idealized wind farms but simulated in a stable or an unstable boundary layer. Terrain had a pronounced influence on wake and blockage effects in the simulation results. Further, the RANS-predicted wind farm efficiencies and turbine efficiencies in terrain, whether idealized or real, departed markedly from back-to-back RANS-predictions on flat ground.

Hill-induced streamwise pressure gradients can have a large influence on wake development, and we propose, based on the results of this study, that this effect can feed back to influence upstream slowdowns related to blockage. Further analysis of the results, including an assessment of local Froude number, suggests that the inviscid response of stratified flow to a wind farm in terrain can additionally affect wind farm blockage – in a way related to but distinct from its effect on blockage via terrain-induced pressure gradients as they pertain to wake recovery.

This work differs in a few ways from earlier studies on the combination of terrain and wind turbines. Perhaps most notably, we consider the effect of terrain on both wakes *and* blockage. And whereas previous studies were limited to purely neutral flows, with no buoyancy, this study includes the effects of thermal stratification, which can significantly modify flow over terrain and its response to the presence of a wind farm. Finally, by virtue of simulating full wind farms, we directly connect the impact of terrain to wind farm efficiency.

That said, this study is not without its own limitations. From the terrain to the wind farm layouts to the atmosphere, the simulated conditions are mostly idealized. The simulations of an existing wind farm mitigate this concern somewhat in that the results are reasonably consistent with the findings from the idealized wind farms. Nevertheless, the general applicability of some of these findings can be fairly questioned due to the limited range of layout types and terrain types investigated. An analysis of a broader range of wind farms could help provide a more comprehensive understanding of the impact of terrain on wakes and blockage. Further, relevant, publicly available field observations could help improve confidence in the model and the study findings.

In the meantime, between this study and those that came before, there appears to be enough evidence to make the following claim: At proposed wind farm sites where terrain induces significant streamwise variation in wind speed, energy yield prediction approaches that do not capture the effect of terrain on wakes and blockage are at increased risk of elevated

prediction errors. This could materially increase uncertainty in the energy yield predictions and perhaps even lead to less efficient wind farm layout designs.

940 **Acknowledgments.** Christiane Montavon, Mikael Sjöholm, and Lars Landberg provided feedback that led to improvements in the paper. Leo Barriatto provided the WRF results and most of the inputs for the RANS simulations of the real wind farm.

**Financial support.** This research has been supported by the FLOW project (Atmospheric Flow, Load and pOwer for Wind energy) within the EU Horizon Europe program (grant no. 101084205).

## References

945 Allaerts, D. and Meyers, J. Sensitivity and feedback of wind-farm-induced gravity waves, *J. Fluid Mech.* 862, 990-2028, doi:10.1017/jfm.2018.969, 2019.

Baines, P.G. *Topographic Effects in Stratified Flow*, Second Edition, Cambridge University Press, Cambridge, UK, 2022.

[Bastankhah, M., Mohammadi, M.M., Lees, C., Diaz, G.P.N., Buxton, O.R.H., Ivanell, S. A fast-running physics-based wake model for a semi-infinite wind farm. \*J. Fluid Mech.\*, 985, A43, doi:10.1017/jfm.2024.282, 2024.](#)

950 Bayron, P., Kelso, R., Chin, R. Experimental study on the evolution of wind turbine wake under streamwise pressure gradients, *Energy Conversion and Management: X*, 20, 100479, doi: 10.1016/j.ecmx.2023.100479, 2023.

Bleeg, J., Digraskar, D., Woodcock, J., Corbett, J.F. Modeling stable thermal stratification and its impact on wind flow over topography, *Wind Energy*, 18, 369-383, doi:10.1002/we.1692, 2015.

955 Bleeg, J., Digraskar, D., Horn, U., Corbett, J.F. Modelling Stability at Microscale, Both Within and Above the Atmospheric Boundary Layer, Substantially Improves Wind Speed Predictions, Proceedings of the EWEA Conference, Paris, France, 17-20 November, 2015.

Bleeg, J., Purcell, M., Ruisi, R., Traiger, E. Wind Farm Blockage and the Consequences of Neglecting Its Impact on Energy Production, *Energies*, 11, 1609, doi:10.3390/en11061609, 2018.

960 Bleeg, J. and Montavon, C. Blockage effects in a single row of wind turbines, *J. Phys. Conf. Ser.*, 2265, 022011, doi: 10.1088/1742-6596/2265/2/022001, 2022.

Bleeg, J., Del Hoyo, M., Montavon, C. Modelling the convective boundary layer at microscale using RANS, WESC, Glasgow, UK, 23-26 May, 2023, <https://doi.org/10.5281/zenodo.15039844>, 2023.

Bleeg, J., Vishwakarma, P., Del Hoyo, M., Simmons, L. The impact of blockage and wakes on seven power performance tests conducted at two wind farms, *J. Phys. Conf. Ser.*, 2767, 042026, doi:10.1088/1742-6596/2767/4/042026, 2024.

965 Bortolotti, P., Tarres, H.C., Dykes, K., Merz, K., Sethura, L. IEA Wind Task 37 on Systems Engineering in Wind Energy – WP21 Reference Wind Turbines, International Energy Agency, NREL/TP-73492, 2019.

[Brogna, B. Feng, J., Sørensen, J.N., Shen, W.Z., Porté-Agel, F. A new wake model and comparison of eight algorithms for layout optimization of wind farms in complex terrain. \*Applied Energy\*, 259, doi:10.1016/j.apenergy.2019.114189, 2020.](#)

Field Code Changed

Field Code Changed

- 970 Cai, T., Cheng, S., Segalini, A., Chamorro, L. Local topography-induced pressure gradient effects on the wake and power  
output of a model wind turbine, *Theor. Appl. Mech. Lett.*, 11, 100297, doi:10.1016/j.taml.2021.100297, 2021.
- Dar, A.S. and Porté-Agel, F. An Analytical Model for Wind Turbine Wakes under Pressure Gradient, *Energies*, 15, 5345,  
doi:10.3390/en15155345, 2022.
- [Dar, A.S. and Porté-Agel, F. Wind turbine wakes on escarpments: A wind-tunnel study, \*Renewable Energy\*, 181: 1258-1275,  
https://doi.org/10.1016/j.renene.2021.09.102, 2022](https://doi.org/10.1016/j.renene.2021.09.102)
- 975 Dar, A.S., Gertler, A.S., Porté-Agel, F. An experimental and analytical study of wind turbine wakes under pressure gradient,  
*Phys. Fluids*, 35, 045140, doi: 10.1063/5.0145043, 2023.
- [Farrell, A., King, J., Draxl, C., Mudafort, R., Hamilton, N., Bay, C.J., Fleming, P., Simley, E. Design and analysis of a wake  
model for spatially heterogeneous flow. \*Wind Energ. Sci.\*, 6, 737-758, doi:10.5194/wes-6-737-2021, 2021.](https://doi.org/10.5194/wes-6-737-2021)
- Hyvärinen, A., Lacagnina, G., Segalini, A. A wind-tunnel study of the wake development behind wind turbines over  
980 sinusoidal hills. *Wind Energy*, 21: 605-617, doi:10.1002/we.2181, 2018.
- International Electrotechnical Commission: Power performance measurements of electricity producing wind turbines, IEC  
61400-12-1:2022, <https://webstore.iec.ch/en/publication/68499>, 2022.
- Kashyap, P.P.K.: Impact Assessment of Wind Farm Blockage in Complex Terrain. M.S. thesis, DTU, 2022.
- [Lanzilao, L. and Meyers, J. A new wake-merging method for wind-farm power prediction in the presence of heterogeneous  
985 background velocity fields. \*Wind Energy\*, 25: 237-259, doi:10.1002/we.2669, 2022.](https://doi.org/10.1002/we.2669)
- Lanzilao, L. and Meyers, J. A parametric large-eddy simulation study of wind-farm blockage and gravity waves in  
conventionally neutral boundary layers. *J. Fluid Mech.*, 979, A54, doi:10.1017/jfm.2023.1088, 2024.
- Liu, L. and Stevens, J.A.M.: Effects of Two-Dimensional Steep Hills on the Performance of Wind Turbines and Wind  
Farms, *Boundary-Layer Meteorol.*, 176, 251-269, doi:10.1007/s10546-020-00522-z, 2020.
- 990 Medici, D., Ivanell, S., Dahlberg, J.A., Alfredsson, P.H. The upstream flow of a wind turbine: blockage effect, *Wind Energy*,  
14, 691-697, <https://doi.org/10.1002/we.451>, 2011.
- Montavon, C., Bleeg, J., Riechert, J., Steger, M., Soderberg, S., Schmitt, C. Measuring and Modelling Wind Farm Blockage  
Offshore, *Wind Europe Technology Workshop*, Online, 8-10 September, 2021.
- Montavon, C., Steger, M., Bleeg, J., Del Hoyo, M., Menke, R., Schmitt, C., Riechert, J., Rautenstrauch, J. Blockage and  
995 cluster-to-cluster interactions from dual scanning lidar measurements, *WESC*, Glasgow, UK, 23-26 May, 2023,  
<https://doi.org/10.5281/zenodo.8000511>, 2023.
- Montavon, C., Rodaway, C., Gunn, K., Smith, G., Dunsmore, D., Del Hoyo, M., Sinclair, K. Cluster wakes and their effect  
on a wind farm annual energy production, *White Paper*, DNV and RWE, 2024.
- Ndindayino, O., Puel, A., and Meyers, J. Effect of blockage on wind turbine power and wake development, *Wind Energy  
1000 Science*, 10, 2079-2098, <https://doi.org/10.5194/wes-10-2079-2025>, 2025.
- Patel, J.A., Maity, A., Ghaisas, N.S. The Influence of Topographic Variations on Wind Turbine Wake Characteristics Using  
LES, *J. Phys. Conf. Ser.*, 2767, 092086, doi:10.1088/1742-6596/2767/9/092086, 2024.

Field Code Changed

Field Code Changed

Field Code Changed

- 1005 Politis, E.S., Prospathopoulos, J., Cabezon, D., Hansen, K.S., Chaviaropoulos, P.K., Barthelmie, R.J.: Modeling wake effects in large wind farms in complex terrain: the problem, the methods, and the issues, *Wind Energy*, 15, 161-182, [doi:10.1002/we.481](https://doi.org/10.1002/we.481), 2012.
- Radünz, W.C., Carmo, B., Lundquist, J.K., Letizia, S., Abraham, A., Wise, A., Gomez, M.S., Hamilton, N., Rai, R.K., Peixoto, P.S. Influence of simple terrain on the spatial variability of a low-level jet and wind farm performance in the AWAKEN field campaign, *Wind Energy Science*, 10, 2365-2393, doi:10.5194/wes-10-2365-2025, 2025.
- Revaz, T. and Porté-Agel, F. Effect of hills on wind turbine flow and power efficiency: A large-eddy simulation study, *Phys. Fluids*, 36, 095180, doi:10.1063/5.0226544, 2024.
- 1010 Shamsoddin, S. and Porté-Agel, F. Wind turbine wakes over hills, *J. Fluid Mech.*, 855, 671-702, doi:10.1017/jfm.2018.653, 2018.
- Siemens PLM Software: User Guide for STAR-CCM+, Version 2022.1; Plano, TX, USA, 2022.
- Tian, W., Ozbay, A., Yuan, W., Sarakar, P., Hu, H. An Experimental Study on the Performances of Wind Turbines over 1015 Complex Terrain, 51<sup>st</sup> AIAA Aerospace Sciences Meeting, Grapevine, TX, 7-10 January, doi:10.2514/6.2013-612, 2013.
- Troldborg, N., Andersen, S.J., Hodgson, E.L., Meyer Forsting, A. Brief communication: How does complex terrain change the power curve of a wind turbine? *Wind Energy Science*, 7, 1527-1532, doi:10.5194/wes-7-1527-2022, 2022
- 1020 van der Laan, M., Sørensen, N.N., Réthoré, P.E., Mann, J., Kelly, M.C. The  $k-\epsilon-f_p$  model applied to double wind turbine wakes using different actuator disk force methods, *Wind Energy*, 18, 2223-2240, doi:10.1002/we.1816, 2014.
- Vosper, S.B. Inversion effects on mountain lee waves, *Q.J.R. Meteorol. Soc.*, 130, 1723-1748, doi:10.1256/qj.03.63, 2004.
- Vulfson, A. and Nikolaev, P. Local similarity theory of convective turbulent layer using “spectral” Prandtl mixing length and second moment of vertical velocity, *J. Atmos. Sci.*, 79, 101-118, doi:10.1175/JAS-D-20-0330.1, 2022.
- 1025 [Yang, X., Howard, K.B., Guala, M., Sotiropoulos, F. Effects of a three-dimensional hill on the wake characteristics of a model wind turbine, \*Phys. Fluids\*, 27, 025103, <https://doi.org/10.1063/1.4907685>, 2015.](https://doi.org/10.1063/1.4907685)
- Zengler, C.P., Troldborg, N., Gaunaa, M. Is the free wind speed sufficient to determine aerodynamic turbine performance in complex terrain? , *J. Phys. Conf. Ser.*, 2767, 092049, doi:10.1088/1742-6596/2767/9/092049, 2024.
- Zhang, M., Du, B., Ge, M., Liu, Y. Influence of pressure gradient on the wake evolution of aligned wind turbines: A large-eddy simulation study, *IET Conference Proceedings*, 15, 1240-1244, doi: 10.1049/icp.2023.2479, 2023.
- 1030 [Zhang, Z., Huang, P., Bisuamlak, G., Cao, S. Large-eddy simulation of upwind-hill effects on wind-turbine wakes and power performance, \*Energy\*, 294, 130823, 2024.](https://doi.org/10.1016/j.energy.2024.130823)

## Appendix

We conducted control volume analyses (CVA) to parse and better understand the various contributors to wake recovery between the first and second rows in the *flat*, *hill windward*, and *hill leeward* RANS results discussed in Section 3.1. The control volume for the *hill leeward* case is depicted in Fig. A-1. In each of the cases, the control volume coincides with the rotor layer, from 35 m above ground level (a.g.l.) to 195 m a.g.l. The western surface of the control volume is 2.5 D downstream of the first row and the eastern surface is 2.5 D upstream of the second row. These x-locations were chosen to avoid, largely, the strong pressure variations in the near wakes and induction zones of the turbines. The northern surface is 3.0 D north of the hub of the northernmost turbine in the wind farm, and the southern surface is 3.0 D south of the wind farm.

The CVA focuses on the conservation of the x-component of momentum. Since the wind direction through the control volume is very close to 270°, consideration of the y-component of momentum in the CVA is not expected to significantly affect this assessment of the contributors to wake recovery. The contributors to the x-component of momentum in the control volume are depicted in Fig. A-1 and are as follows.  $M_{x,i}$  refers to the advection of the x-component of momentum through surface  $i$ , where  $i$  is either  $W$ ,  $E$ ,  $N$ ,  $S$ ,  $B$ , or  $T$  (west, east, north, south, bottom, or top).  $F_{p,i}$  is the x-component of the pressure force on surface  $i$ .  $F_{p,T}$  and  $F_{p,B}$  are zero in the *flat* case.  $F_C$  is the x-component of the Coriolis force acting on the control volume. In this CVA, the geostrophic pressure field is included in the pressure forces, not the Coriolis force. Finally,  $F_{S,i}$  is the x-component of the resultant force due to Reynolds stresses (turbulent fluxes) acting on surface  $i$ ; these terms represent the turbulent transport of momentum, also referred to as the turbulent diffusion of momentum. The equation for the conservation of momentum in the control volume ( $V$ ) is as follows:

$$\int \frac{\partial(\rho u)}{\partial t} dV = (M_{x,W} - M_{x,E}) + (M_{x,S} - M_{x,N}) + (M_{x,B} - M_{x,T}) + F_p + F_C + (F_{S,W} + F_{S,E} + F_{S,S} + F_{S,N} + F_{S,B} + F_{S,T}) \quad (\text{A1})$$

$F_p$  is the x-component of the of the resultant sum of the pressure forces on the control volume.  $\rho$  is the density, and  $u$  is the x-component of velocity. Since the simulations are steady-state, the time rate of change of momentum is zero:

$$0 = (M_{x,W} - M_{x,E}) + (M_{x,S} - M_{x,N}) + (M_{x,B} - M_{x,T}) + F_p + F_C + (F_{S,W} + F_{S,E} + F_{S,S} + F_{S,N} + F_{S,B} + F_{S,T}) \quad (\text{A2})$$

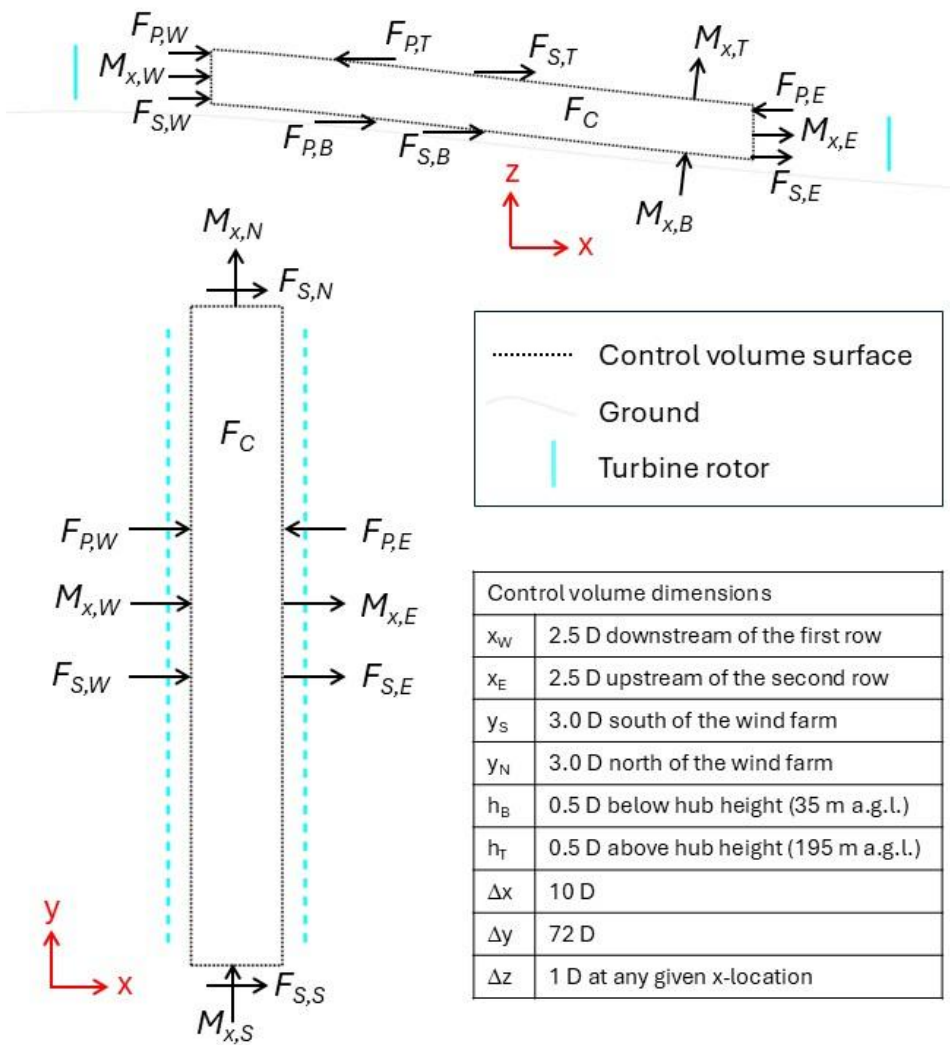

1060 Figure A-1: Diagram of the control volume analysis for two-row cases in Section 3.1. The side view, on an  $xz$ -plane, is from the *hill leeward* case.

Moving the first bracketed term over to the left-hand side, we get an equation for the increase in the advection of the x-component of momentum from the west surface to the east surface—from 2.5 D downstream of the first row of turbines to 2.5 D upstream of the second row of turbines:

$$M_{x,E} - M_{x,W} = (M_{x,S} - M_{x,N}) + (M_{x,B} - M_{x,T}) + F_P + F_C + (F_{S,W} + F_{S,E} + F_{S,S} + F_{S,N} + F_{S,B} + F_{S,T}) \quad (\text{A3})$$

We can combine some of the advection terms to simplify the presentation of the results:  $M_{x,S-N} = M_{x,S} - M_{x,N}$ ;  $M_{x,B-T} = M_{x,B} - M_{x,T}$ ; and  $M_{x,E-W} = M_{x,E} - M_{x,W}$ .  $M_{x,S-N}$  is the net lateral advection of the x-component of momentum into the control volume.  $M_{x,B-T}$  is the net advection of the x-component of momentum through the bottom and top surfaces. And again,  $M_{x,E-W}$  is the increase in the advection of the x-component of momentum from the west surface to the east surface.

$$M_{x,E-W} = M_{x,S-N} + M_{x,B-T} + F_P + F_C + (F_{S,W} + F_{S,E} + F_{S,S} + F_{S,N} + F_{S,B} + F_{S,T}) \quad (\text{A4})$$

Table A-1 shows how the terms in Eq. (A4) can be determined from the state variables of the RANS solutions. In these equations,  $\mathbf{u}$  is the velocity vector,  $v$  is the y-component of velocity,  $w$  is the z-component of velocity,  $p$  is the pressure,  $\mu_T$  is the turbulent viscosity,  $f_c$  is the Coriolis parameter, and  $\mathbf{n}$  is the local surface normal pointing into the control volume.

|                                        |                                                                                                                                                                                                                                                                                                                                                                                                                                                                                                                                                                                                                                                                                                                                                                                                                                                                     |
|----------------------------------------|---------------------------------------------------------------------------------------------------------------------------------------------------------------------------------------------------------------------------------------------------------------------------------------------------------------------------------------------------------------------------------------------------------------------------------------------------------------------------------------------------------------------------------------------------------------------------------------------------------------------------------------------------------------------------------------------------------------------------------------------------------------------------------------------------------------------------------------------------------------------|
| <u>Advection</u>                       | $M_{x,E-W} = \int \rho u^2 dA \Big _E - \int \rho u^2 dA \Big _W$ $M_{x,S-N} = \int \rho uv dA \Big _S - \int \rho uv dA \Big _N$ $M_{x,B-T} = \int \rho u(\mathbf{n} \cdot \mathbf{u}) dA \Big _B + \int \rho u(\mathbf{n} \cdot \mathbf{u}) dA \Big _T$                                                                                                                                                                                                                                                                                                                                                                                                                                                                                                                                                                                                           |
| <u>Pressure force</u>                  | $F_P = \int p(\mathbf{n} \cdot \hat{\mathbf{x}}) dA$                                                                                                                                                                                                                                                                                                                                                                                                                                                                                                                                                                                                                                                                                                                                                                                                                |
| <u>Coriolis force</u>                  | $F_C = \int \rho v f_c dV$                                                                                                                                                                                                                                                                                                                                                                                                                                                                                                                                                                                                                                                                                                                                                                                                                                          |
| <u>Turbulent transport of momentum</u> | $F_{S,W} = -2 \int \mu_T \frac{\partial u}{\partial x} dA \Big _W ; F_{S,E} = 2 \int \mu_T \frac{\partial u}{\partial x} dA \Big _E$ $F_{S,S} = -\int \mu_T \left( \frac{\partial u}{\partial y} + \frac{\partial v}{\partial x} \right) dA \Big _S ; F_{S,N} = \int \mu_T \left( \frac{\partial u}{\partial y} + \frac{\partial v}{\partial x} \right) dA \Big _N$ $F_{S,B} = -\int \mu_T \left( \frac{\partial u}{\partial z} + \frac{\partial w}{\partial x} \right) (\mathbf{n} \cdot \hat{\mathbf{z}}) dA \Big _B - 2 \int \mu_T \frac{\partial u}{\partial x} (\mathbf{n} \cdot \hat{\mathbf{x}}) dA \Big _B$ $F_{S,T} = -\int \mu_T \left( \frac{\partial u}{\partial z} + \frac{\partial w}{\partial x} \right) (\mathbf{n} \cdot \hat{\mathbf{z}}) dA \Big _T - 2 \int \mu_T \frac{\partial u}{\partial x} (\mathbf{n} \cdot \hat{\mathbf{x}}) dA \Big _T$ |

Table A-1: Definitions for the terms in Eq. (A4)

1080 The terms in Eq. (A4) were computed for each wind farm and freestream simulation. Fig. A-2 contains bar charts showing the values of these terms for the *flat*, *hill windward*, and *hill leeward* cases. The blue bars correspond to the wind farm simulations. The red bars correspond to the freestream simulations. All values are normalized by the  $M_{x,W}$  value for the corresponding simulation. The momentum accounting in Eq. (A4) should balance, but due, likely, to interpolation and discretization errors incurred during the post-processing of the RANS data, there is a small residual needed to balance the equation. The absolute value of the residual is less than 1% of  $M_{x,W}$  in all cases (0.1% for both *flat* simulations, 0.4-0.5% for the *hill windward* simulations, and 0.5-0.6% for the *hill leeward* simulations).

1085 Note that in the following discussion on the contributors to  $M_{x,E-W}$ , we refer exclusively to the values in Fig. A-2, which are normalized. When we write, for example, that the contribution of pressure is X% higher in the wind farm simulation compared with the freestream simulation for a given case, it means that  $F_p$  normalized by  $M_{x,W}$  in the wind farm simulation is X percentage points higher than  $F_p$  normalized by  $M_{x,W}$  in the freestream simulation.

1090 The freestream solution for the *flat* case is nearly horizontally homogeneous (see Fig. A-2a). Turbulent transport of momentum through the top and bottom surfaces are together in balance with a west-to-east pressure drop such that the advection of momentum through the east boundary is almost the same as that through the west boundary. In the *flat* wind farm simulation, the advection of the x-component of momentum is 3.7% higher through the east surface than through the west surface. The primary contributor to this increase is the turbulent diffusion of momentum through the top surface ( $F_{S,T}$ ). This normalized shear force, which is in the positive x-direction, is much higher in the wind farm case than in the freestream case. The shear force on the bottom surface, which is in the negative x-direction, is about the same in the wind farm case compared to the freestream case. The net effect is a positive contribution of turbulent diffusion to  $M_{x,E-W}$  – enough to offset the negative contribution from the wind-farm-induced pressure field.

1100 Wind-farm-induced pressure is generally higher just upstream of a wind farm than downstream of the wind farm; however, within a wind farm, material streamwise pressure increases induced by the wind farm itself can occur, which can affect wake recovery within the farm – as it does in the *flat* case. This effect is highlighted as a substantial negative influence on wake recovery between turbine rows in a simulated wind farm in Bastankhah et al., 2024.

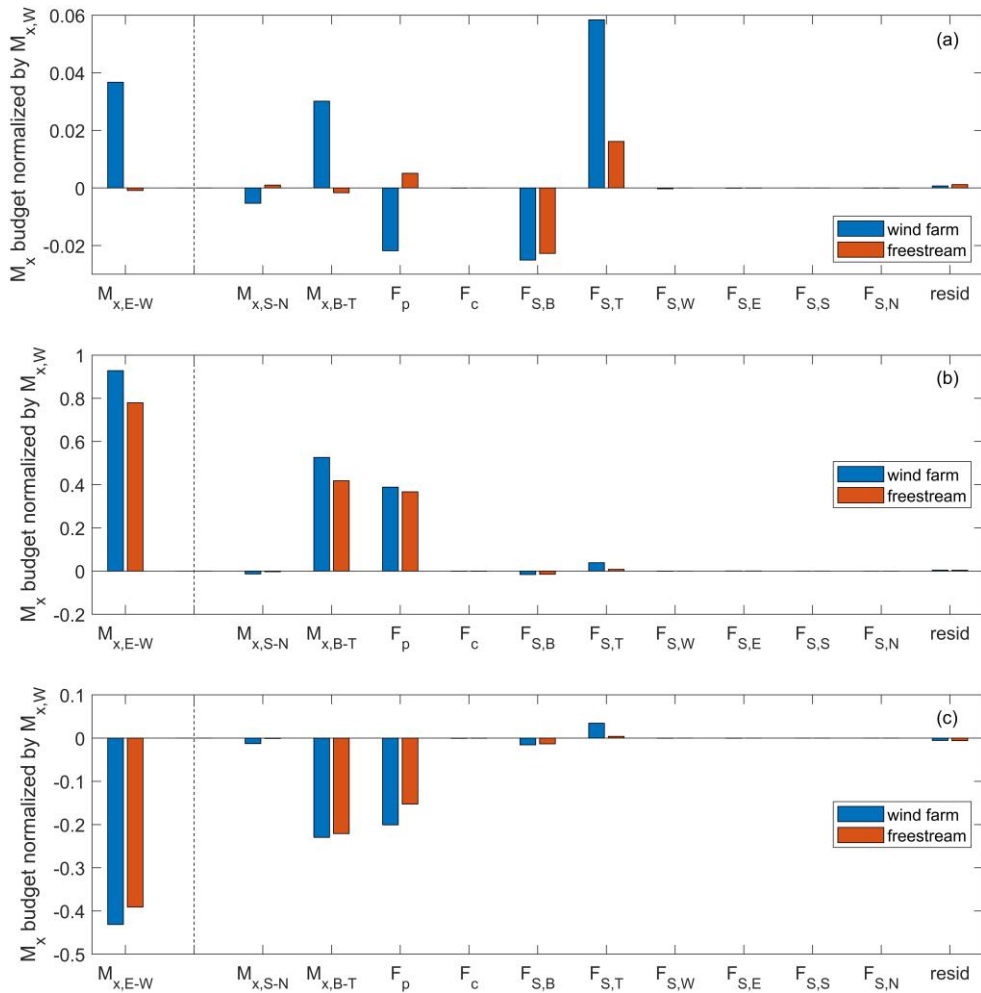

Figure A-2: Budget for the x-component of momentum from the CVA described in Fig. A-1 for the flat case (a), the hill windward case (b), and the hill leeward case (c). The x-axis labels correspond to the terms in Eq. (A4), normalized by  $M_{x,w}$  for each simulation.

In the CVA of the windfarm simulation of the *hill windward* case (Fig A-2b), the advection of the x-component of momentum through the east boundary is nearly twice that of the momentum entering through the west boundary. A significant pressure drop from west to east is a primary contributor to the increase in momentum. (The vertical advection of momentum is also a contributor; however, some of this contribution is very likely connected to the pressure drop, by continuity, as described just above.) The CVA of the freestream simulation also shows a large pressure drop from west to east as well as a large increase in the advection of the x-component of momentum from west to east – though not as large as in the wind farm simulation. Turbulent transport of momentum through the top and bottom boundaries makes a net positive contribution to  $M_{x,E-W}$  in the wind farm simulation (2.3%) while the net contribution is slightly negative in the freestream case (-0.7%). A comparison with the CVA for the *flat* case sheds light on why the wake recovery is greater between the first row and second row in the *hill windward* case. The improved wake recovery does not appear to be driven by turbulence, as the net contribution of turbulent diffusion to  $M_{x,E-W}$  relative to freestream is smaller in the *hill windward* case (3.0%) compared with the *flat* case (4.0%). In contrast, the effect of terrain on pressure clearly increases wake recovery in the *hill windward* case compared with the *flat* case. In the *hill windward* case, the contribution of pressure to  $M_{x,E-W}$  in the wind farm simulation is 2.2% higher than in the freestream simulation; it is 2.7% lower than freestream in the *flat* case. The deflection of the wake downward towards the ground in the *hill windward* case compared to the *flat* case also likely contributes to the increase in  $M_{x,E-W}$ , an effect that is included in  $M_{x,B-T}$ .

In the CVA of the wind farm simulation of the *hill leeward* case (Fig. A-2c), the advection of the x-component of momentum through the east surface is 43.1% lower than through the west surface – which is 4.0% lower than in the freestream simulation. There is no wake recovery between the west and east surfaces; the wake deficits instead get larger – the mean wind speed is 16.1% lower than freestream at the west surface and 18.3% lower than freestream at the east surface. The turbulent diffusion of momentum makes a net positive contribution to the  $M_{x,E-W}$  budget relative to freestream (+2.8%). This contribution is less than the net positive contribution of turbulent diffusion relative to freestream in the *flat* case (+4.0%). Thus, differences in turbulent diffusion explain some of the difference in wake recovery between the *flat* and *hill leeward* cases; however, it cannot cause the negative wake recovery evident in the *hill leeward* case, where the wind speeds relative to freestream are lower at the east surface than the west. This is the result of a significant pressure rise from west to east. Relative to freestream conditions, the x-component of the pressure force on the control volume in the wind farm simulation contributes -4.8% to  $M_{x,E-W}$ . The deflection of the wake upwards in the *hill leeward* case relative to the *flat* case may also contribute to lowering  $M_{x,E-W}$ , though as discussed in Section 3.1, the effect appears to be comparatively small.

Note that the turbulent transport of momentum contributes about the same amount to wake recovery in the *hill windward* case (3.0%) as in the *hill leeward* case (2.8%). The large difference in wake recovery between these two cases appears to have more to do with the substantial differences in the contributions of pressure.

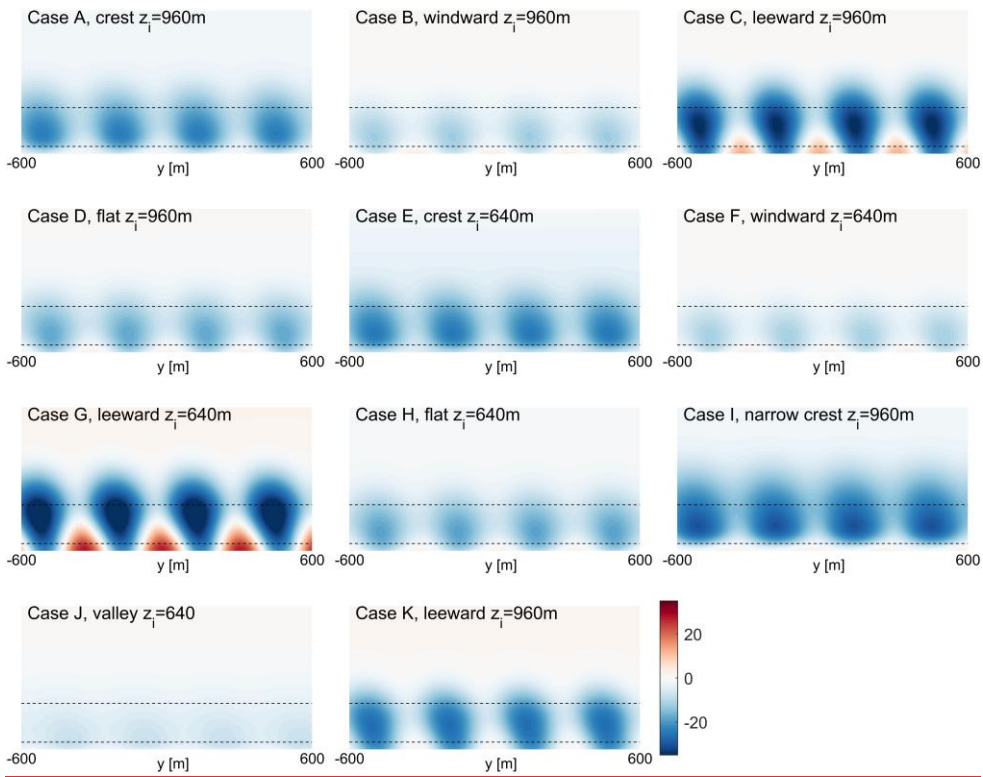

**Figure A-3: Percent change in wind speed relative to freestream on a vertical plane located 8 D downstream of the row of turbines for the eleven single-row cases for which top views of the percent change in wind speed are shown in Section 3.2. Dashed lines demark the rotor layer (heights of 35 m and 195 m).**
